# Supplementary material
Source: PubMed Central journal article supplement (PMC4886753)
Supplement: JB.00212-16_zjb999094077so1.pdf [file JB.00212-16_zjb999094077so1.pdf]

## SUPPLEMENTAL MATERIALS

Analysis of the spore membrane proteome in *Clostridium perfringens* implicates cyanophycin in spore coat assembly

Hualan Liu<sup>1</sup>, W. Keith Ray<sup>2</sup>, Richard F. Helm<sup>2</sup>, David L. Popham<sup>1</sup>, and Stephen B. Melville<sup>1\*</sup>

<sup>1</sup>Department of Biological Sciences, <sup>2</sup>Department of Biochemistry, Virginia Tech, Blacksburg, VA 24061, USA

\* Corresponding author: Department of Biological Sciences,  
217 Life Sciences 1, Virginia Tech, Blacksburg, VA 24061  
phone: 540-231-1441, fax: 540-231-9307, e-mail: [melville@vt.edu](mailto:melville@vt.edu)

## CONTENTS

**Table S1.** Total proteins detected in dormant spore membrane samples

**Table S2.** Total proteins detected in germinated spore membrane samples

**Table S3.** Predicted spore inner membrane proteins.

**Table S4.** Differentially detected Membrane Protein Function Categorization

**Figure S1.**  $\beta$ -glucuronidase activity in strain SM101 carrying plasmids pHLL71 (*cphB-gusA*) and pSM240 (empty vector).

**Figure S2.** Survival of spores in spent sporulation medium (DSSM).

**Figure S3.** Spore sizes measured by phase contrast light microscopy of dormant spores and spores germinated and stored for 16 h in nutrient free medium.

**Table S1. Total proteins detected in dormant spore membrane samples**

| UniProt ID             | gene name (CPR_) | protein localization <sup>a</sup> | protein function                                                               |
|------------------------|------------------|-----------------------------------|--------------------------------------------------------------------------------|
| tr Q0SQS3 Q0SQS3_CLOPS | 2258             | cell wall                         | Oligopeptide/dipeptide ABC transporter, oligopeptide/dipeptide-binding protein |
| tr Q0SWX9 Q0SWX9_CLOPS | 0006             | Cytoplasmic                       | DNA gyrase subunit B, GyrB                                                     |
| tr Q0SWX8 Q0SWX8_CLOPS | 0007             | Cytoplasmic                       | DNA gyrase subunit A, GyrA                                                     |
| sp Q0SWW9 SYS_CLOPS    | 0014             | Cytoplasmic                       | Serine--tRNA ligase, SerS                                                      |
| tr Q0SWX5 Q0SWX5_CLOPS | 0015             | Cytoplasmic                       | Uncharacterized protein                                                        |
| sp Q0SWT9 PEPT_CLOPS   | 0029             | Cytoplasmic                       | Peptidase T, PepT                                                              |
| tr Q0SWT7 Q0SWT7_CLOPS | 0032             | Cytoplasmic                       | Uncharacterized                                                                |
| tr Q0SWZ0 Q0SWZ0_CLOPS | 0082             | Cytoplasmic                       | Glycogen synthase, GlgA                                                        |
| tr Q0SWY9 Q0SWY9_CLOPS | 0083             | Cytoplasmic                       | Phosphorylase                                                                  |
| sp Q0SWS5 GLGC_CLOPS   | 0086             | Cytoplasmic                       | Glucose-1-phosphate adenylyltransferase, GlgC                                  |
| tr Q0SWS4 Q0SWS4_CLOPS | 0087             | Cytoplasmic                       | Glucose-1-phosphate adenylyltransferase, GlgD subunit                          |
| tr Q0SWS0 Q0SWS0_CLOPS | 0092             | Cytoplasmic                       | Putative PTS system, N-acetylglucosamine-specific IIA component                |
| tr Q0SWR5 Q0SWR5_CLOPS | 0098             | Cytoplasmic                       | Putative glucokinase                                                           |
| tr Q0SWR4 Q0SWR4_CLOPS | 0099             | Cytoplasmic                       | Rubredoxin/rubrerythrin                                                        |
| sp Q0SWR1 LDH_CLOPS    | 0102             | Cytoplasmic                       | L-lactate dehydrogenase, LDH                                                   |
| tr Q0SWN1 Q0SWN1_CLOPS | 0132             | Cytoplasmic                       | Rubrerythrin, Rbr_1                                                            |
| tr Q0SWK7 Q0SWK7_CLOPS | 0156             | cytoplasmic                       | Beta-galactosidase                                                             |
| sp Q0SWK6 ARCA_CLOPS   | 0157             | Cytoplasmic                       | Arginine deiminase, ArcA                                                       |
| sp Q0SWK5 OTC_CLOPS    | 0158             | Cytoplasmic                       | Ornithine carbamoyltransferase, ArcB                                           |
| tr Q0SWJ0 Q0SWJ0_CLOPS | 0173             | Cytoplasmic                       | Nitroreductase family protein                                                  |
| tr Q0SWG2 Q0SWG2_CLOPS | 0203             | Cytoplasmic                       | Heme oxygenase                                                                 |
| tr Q0SWB3 Q0SWB3_CLOPS | 0256             | Cytoplasmic                       | Glycosyl transferase, group 1 family protein                                   |
| tr Q0SWA8 Q0SWA8_CLOPS | 0261             | Cytoplasmic                       | [Fe] hydrogenase                                                               |
| tr Q0SW95 Q0SW95_CLOPS | 0275             | Cytoplasmic                       | Metallo-beta-lactamase family/flavodoxin                                       |
| tr Q0SW87 Q0SW87_CLOPS | 0284             | Cytoplasmic                       | Uncharacterized protein                                                        |
| tr Q0SW84 Q0SW84_CLOPS | 0287             | Cytoplasmic                       | Putative transketolase, N-terminal subunit                                     |
| tr Q0SW83 Q0SW83_CLOPS | 0288             | Cytoplasmic                       | Putative transketolase, C-terminal subunit                                     |
| tr Q0SW42 Q0SW42_CLOPS | 0329             | Cytoplasmic                       | UvrABC system protein, UvrA                                                    |
| sp Q0SW37 MURB_CLOPS   | 0334             | Cytoplasmic                       | UDP-N-acetylenolpyruvoylglucosamine reductase, MurB                            |
| tr Q0SW30 Q0SW30_CLOPS | 0341             | Cytoplasmic                       | 6-phosphofructokinase, PfkA                                                    |
| tr Q0SW29 Q0SW29_CLOPS | 0342             | Cytoplasmic                       | Pyruvate kinase, Pyk_1                                                         |
| tr Q0SW01 Q0SW01_CLOPS | 0370             | Cytoplasmic                       | Uridine phosphorylase, Udp                                                     |
| sp Q0SW00 DEOB_CLOPS   | 0371             | Cytoplasmic                       | Phosphopentomutase, DeoB                                                       |
| tr Q0SVZ8 Q0SVZ8_CLOPS | 0373             | Cytoplasmic                       | Histidine decarboxylase, pyruvoyl type                                         |
| tr Q0SVT9 Q0SVT9_CLOPS | 0432             | Cytoplasmic                       | Uncharacterized protein                                                        |

|                        |      |             |                                                              |
|------------------------|------|-------------|--------------------------------------------------------------|
| tr Q0SVR5 Q0SVR5_CLOPS | 0456 | Cytoplasmic | UDP-glucose/GDP-mannose dehydrogenase family                 |
| tr Q0SVQ3 Q0SVQ3_CLOPS | 0468 | Cytoplasmic | UDP-glucose 4-epimerase, GalE_2                              |
| tr Q0SVP7 Q0SVP7_CLOPS | 0475 | Cytoplasmic | Alpha-galactosidase, Aga                                     |
| tr Q0SVL0 Q0SVL0_CLOPS | 0512 | Cytoplasmic | Nitrite/sulfite reductase homolog                            |
| tr Q0SVK3 Q0SVK3_CLOPS | 0519 | Cytoplasmic | FMN-dependent NADH-azoreductase, Azor                        |
| tr Q0SVF7 Q0SVF7_CLOPS | 0566 | Cytoplasmic | Uncharacterized protein                                      |
| tr Q0SVE6 Q0SVE6_CLOPS | 0577 | Cytoplasmic | M18 family aminopeptidase                                    |
| tr Q0SVE2 Q0SVE2_CLOPS | 0581 | Cytoplasmic | Peptide chain release factor 3, PrfC                         |
| sp Q0SVB1 SYQ_CLOPS    | 0612 | Cytoplasmic | Glutamine--tRNA ligase, GlnS                                 |
| tr Q0SVA5 Q0SVA5_CLOPS | 0618 | Cytoplasmic | Uncharacterized protein                                      |
| sp Q0SVA4 SYY_CLOPS    | 0619 | Cytoplasmic | Tyrosine--tRNA ligase, TyrS                                  |
| tr Q0SV42 Q0SV42_CLOPS | 0682 | Cytoplasmic | Rubredoxin/rubrerythrin                                      |
| sp Q0SV41 TAL_CLOPS    | 0683 | Cytoplasmic | Probable transaldolase, Tal                                  |
| tr Q0SV09 Q0SV09_CLOPS | 0715 | Cytoplasmic | Pyridine nucleotide-disulphide oxidoreductase family protein |
| sp Q0SUV5 AZOR_CLOPS   | 0777 | Cytoplasmic | FMN-dependent NADH-azoreductase, Azor                        |
| tr Q0SUS8 Q0SUS8_CLOPS | 0804 | Cytoplasmic | PTS system, mannose/fructose/sorbose family, IIAB            |
| tr Q0SUR7 Q0SUR7_CLOPS | 0815 | cytoplasmic | Glycosyl hydrolase, family 2                                 |
| tr Q0SUP2 Q0SUP2_CLOPS | 0840 | Cytoplasmic | Rubrerythrin, Rbr_2                                          |
| tr Q0SUP0 Q0SUP0_CLOPS | 0842 | Cytoplasmic | Nadh-dependent butanol dehydrogenase a                       |
| tr Q0SUH5 Q0SUH5_CLOPS | 0908 | Cytoplasmic | Sucrose-6-phosphate hydrolase                                |
| tr Q0SUE9 Q0SUE9_CLOPS | 0934 | Cytoplasmic | Spore coat peptide assembly protein CotJc                    |
| tr Q0SUC5 Q0SUC5_CLOPS | 0959 | Cytoplasmic | Glycosyl hydrolase, family 20                                |
| tr Q0SUB0 Q0SUB0_CLOPS | 0974 | Cytoplasmic | Hydroxylamine reductase, Hcp                                 |
| tr Q0SU99 Q0SU99_CLOPS | 0985 | Cytoplasmic | Uncharacterized protein                                      |
| tr Q0SU73 Q0SU73_CLOPS | 1011 | Cytoplasmic | 1,3-propanediol dehydrogenase, DhaT                          |
| tr Q0SU57 Q0SU57_CLOPS | 1027 | Cytoplasmic | Collagen triple helix repeat protein                         |
| tr Q0SU24 Q0SU24_CLOPS | 1061 | cytoplasmic | Oxidoreductase, 2-nitropropane dioxygenase family            |
| sp Q0SU18 SYE_CLOPS    | 1067 | Cytoplasmic | Glutamate--tRNA ligase, GltX                                 |
| tr Q0SU09 Q0SU09_CLOPS | 1076 | Cytoplasmic | M18 family aminopeptidase                                    |
| tr Q0SU05 Q0SU05_CLOPS | 1080 | Cytoplasmic | Uncharacterized protein                                      |
| tr Q0STZ4 Q0STZ4_CLOPS | 1091 | Cytoplasmic | Rubredoxin/flavodoxin/oxidoreductase                         |
| tr Q0STY1 Q0STY1_CLOPS | 1104 | Cytoplasmic | Uncharacterized protein                                      |
| tr Q0STW2 Q0STW2_CLOPS | 1123 | Cytoplasmic | Cyclopropane-fatty-acyl-phospholipid synthase, Cfa           |
| tr Q0STV6 Q0STV6_CLOPS | 1129 | Cytoplasmic | Tetratricopeptide repeat protein                             |
| tr Q0STV5 Q0STV5_CLOPS | 1130 | Cytoplasmic | Glutamine-dependent NAD(+) synthetase, NadE                  |
| tr Q0STV3 Q0STV3_CLOPS | 1132 | Cytoplasmic | SPFH domain protein/band 7 family protein                    |
| sp Q0STU9 FABH_CLOPS   | 1136 | Cytoplasmic | 3-oxoacyl-[acyl-carrier-protein] synthase 3, FabH            |

|                        |      |             |                                                                   |
|------------------------|------|-------------|-------------------------------------------------------------------|
| tr Q0STU8 Q0STU8_CLOPS | 1137 | Cytoplasmic | Malonyl CoA-acyl carrier protein transacylase, FabD               |
| tr Q0STU7 Q0STU7_CLOPS | 1138 | Cytoplasmic | 3-oxoacyl-[acyl-carrier-protein] reductase, FabG                  |
| sp Q0STU4 FABZ_CLOPS   | 1141 | Cytoplasmic | 3-hydroxyacyl-[acyl-carrier-protein] dehydratase FabZ             |
| tr Q0STU3 Q0STU3_CLOPS | 1142 | Cytoplasmic | Acetyl-CoA carboxylase, biotin carboxylase subunit, AccC          |
| sp Q0STS8 CAPPA_CLOPS  | 1157 | Cytoplasmic | Phosphoenolpyruvate carboxylase, PpcA                             |
| tr Q0STR6 Q0STR6_CLOPS | 1169 | Cytoplasmic | Formate acetyltransferase, Pfl                                    |
| tr Q0STQ4 Q0STQ4_CLOPS | 1181 | Cytoplasmic | Threonine dehydratase, catabolic, TdcB                            |
| tr Q0STP7 Q0STP7_CLOPS | 1188 | Cytoplasmic | Haloacid dehalogenase, IB family protein                          |
| tr Q0STN2 Q0STN2_CLOPS | 1203 | Cytoplasmic | 6-phosphofructokinase, PfkA                                       |
| tr Q0STM9 Q0STM9_CLOPS | 1206 | Cytoplasmic | UDP-N-acetylmuramyl tripeptide synthetase MurC homolog            |
| tr Q0STL0 Q0STL0_CLOPS | 1225 | Cytoplasmic | Amidohydrolase family protein                                     |
| tr Q0STI9 Q0STI9_CLOPS | 1246 | Cytoplasmic | Uncharacterized protein                                           |
| tr Q0STI8 Q0STI8_CLOPS | 1247 | Cytoplasmic | Uncharacterized protein                                           |
| sp Q0STE8 XPT2_CLOPS   | 1287 | Cytoplasmic | Xanthine phosphoribosyltransferase 2, Xpt2                        |
| tr Q0STE7 Q0STE7_CLOPS | 1288 | Cytoplasmic | Tetratricopeptide repeat protein                                  |
| tr Q0STE3 Q0STE3_CLOPS | 1292 | cytoplasmic | Ribonuclease R, Rnr                                               |
| sp Q0STE0 ENO_CLOPS    | 1295 | Cytoplasmic | Enolase, Eno                                                      |
| sp Q0STD7 GPMI_CLOPS   | 1298 | Cytoplasmic | 2,3-bisphosphoglycerate-independent phosphoglycerate mutase, GpmI |
| sp Q0STD6 TPIS_CLOPS   | 1299 | Cytoplasmic | Triosephosphate isomerase, TpiA                                   |
| sp Q0STD5 PGK_CLOPS    | 1300 | Cytoplasmic | Phosphoglycerate kinase, Pgk                                      |
| tr Q0STD4 Q0STD4_CLOPS | 1301 | Cytoplasmic | Glyceraldehyde-3-phosphate dehydrogenase, type I, Gap             |
| tr Q0STB4 Q0STB4_CLOPS | 1323 | Cytoplasmic | CBS domain/MgtE intracellular domain protein                      |
| tr Q0STA6 Q0STA6_CLOPS | 1331 | Cytoplasmic | Rubryerythrin                                                     |
| sp Q0STA4 Y1333_CLOPS  | 1333 | Cytoplasmic | UPF0229 protein                                                   |
| tr Q0STA3 Q0STA3_CLOPS | 1334 | Cytoplasmic | Non-specific serine/threonine protein kinase, PrkA                |
| sp Q0ST92 GAL1_CLOPS   | 1345 | Cytoplasmic | Galactokinase, GalK                                               |
| tr Q0ST87 Q0ST87_CLOPS | 1350 | Cytoplasmic | Fructose-1,6-bisphosphate aldolase, class II, Fba                 |
| tr Q0ST63 Q0ST63_CLOPS | 1375 | Cytoplasmic | Methionine aminopeptidase, Map_1                                  |
| sp Q0ST54 CLPX_CLOPS   | 1384 | Cytoplasmic | ATP-dependent Clp protease ATP-binding subunit ClpX               |
| sp Q0ST53 CLPP_CLOPS   | 1385 | Cytoplasmic | ATP-dependent Clp protease proteolytic subunit, ClpP              |
| tr Q0ST49 Q0ST49_CLOPS | 1389 | Cytoplasmic | ATP-dependent RNA helicase, DEAD/DEAH box family                  |
| sp Q0ST47 DEOD_CLOPS   | 1391 | cytoplasmic | Purine nucleoside phosphorylase DeoD-type, DeoD                   |
| tr Q0ST43 Q0ST43_CLOPS | 1395 | Cytoplasmic | Putative peptidase                                                |
| sp Q0ST36 THII_CLOPS   | 1402 | Cytoplasmic | Probable tRNA sulfurtransferase, Thil                             |

|                        |      |             |                                                                      |
|------------------------|------|-------------|----------------------------------------------------------------------|
| tr Q0ST22 Q0ST22_CLOPS | 1416 | cytoplasmic | ClpB protein                                                         |
| tr Q0SSY7 Q0SSY7_CLOPS | 1451 | Cytoplasmic | Uncharacterized protein                                              |
| tr Q0SST9 Q0SST9_CLOPS | 1499 | Cytoplasmic | Glutamate dehydrogenase, GdhA                                        |
| tr Q0SSS2 Q0SSS2_CLOPS | 1517 | Cytoplasmic | SpoVK domain protein                                                 |
| tr Q0SSR9 Q0SSR9_CLOPS | 1520 | Cytoplasmic | Uncharacterized protein                                              |
| tr Q0SSQ1 Q0SSQ1_CLOPS | 1539 | Cytoplasmic | Peptidyl-prolyl cis-trans isomerase, cyclophilin-type                |
| tr Q0SSM8 Q0SSM8_CLOPS | 1563 | Cytoplasmic | Uncharacterized protein                                              |
| tr Q0SSI4 Q0SSI4_CLOPS | 1607 | Cytoplasmic | V-type ATP synthase subunit D, AtpD                                  |
| sp Q0SSI3 VATB_CLOPS   | 1608 | Cytoplasmic | V-type ATP synthase beta chain, AtpB                                 |
| sp Q0SSI2 VATA_CLOPS   | 1609 | Cytoplasmic | V-type ATP synthase alpha chain, AtpA                                |
| sp Q0SSH9 VATE_CLOPS   | 1612 | Cytoplasmic | V-type ATP synthase subunit E, AtpE                                  |
| tr Q0SSF9 Q0SSF9_CLOPS | 1633 | Cytoplasmic | Arginine--tRNA ligase, ArgS                                          |
| tr Q0SSF4 Q0SSF4_CLOPS | 1638 | Cytoplasmic | Putative DNA polymerase III, epsilon subunit                         |
| sp Q0SSE8 RNY_CLOPS    | 1644 | Cytoplasmic | Ribonuclease Y, Rny                                                  |
| sp Q0SSE7 RECA_CLOPS   | 1645 | Cytoplasmic | Protein RecA                                                         |
| sp Q0SSE5 RIMO_CLOPS   | 1647 | Cytoplasmic | Ribosomal protein S12 methylthiotransferase RimO                     |
| tr Q0SSE3 Q0SSE3_CLOPS | 1649 | Cytoplasmic | Putative endopeptidase, ClpP                                         |
| sp Q0SSE0 PNP_CLOPS    | 1652 | Cytoplasmic | Polyribonucleotide nucleotidyltransferase, Pnp                       |
| sp Q0SSD4 IF2_CLOPS    | 1658 | Cytoplasmic | Translation initiation factor IF-2, InfB                             |
| tr Q0SSC8 Q0SSC8_CLOPS | 1664 | Cytoplasmic | 4-hydroxy-3-methylbut-2-en-1-yl diphosphate synthase, IspG           |
| sp Q0SSC2 PYRH_CLOPS   | 1670 | cytoplasmic | Uridylate kinase, PyrH                                               |
| sp Q0SSC1 EFTS_CLOPS   | 1671 | Cytoplasmic | Elongation factor Ts, Tsf                                            |
| sp Q0SSC0 RS2_CLOPS    | 1672 | Cytoplasmic | 30S ribosomal protein S2, RpsB                                       |
| tr Q0SSB2 Q0SSB2_CLOPS | 1680 | Cytoplasmic | 50S ribosomal protein L19, RplS                                      |
| tr Q0SS97 Q0SS97_CLOPS | 1695 | Cytoplasmic | Acetate kinase, AckA_2                                               |
| tr Q0SS89 Q0SS89_CLOPS | 1703 | Cytoplasmic | DAK2 domain protein                                                  |
| sp Q0SS87 RL28_CLOPS   | 1705 | Cytoplasmic | 50S ribosomal protein L28, RpmB                                      |
| tr Q0SS68 Q0SS68_CLOPS | 1724 | Cytoplasmic | Stage IV sporulation protein A, SpoIVA                               |
| tr Q0SS60 Q0SS60_CLOPS | 1732 | Cytoplasmic | RNA polymerase sigma factor, SigG                                    |
| tr Q0SS51 Q0SS51_CLOPS | 1741 | Cytoplasmic | Peptidase, U32 family                                                |
| tr Q0SS47 Q0SS47_CLOPS | 1745 | Cytoplasmic | RNA-metabolizing metallo-beta-lactamase family protein               |
| sp Q0SS42 SYA_CLOPS    | 1750 | Cytoplasmic | Alanine--tRNA ligase, AlaS                                           |
| tr Q0SS37 Q0SS37_CLOPS | 1755 | Cytoplasmic | Cysteine desulfurase, IscS                                           |
| tr Q0SS25 Q0SS25_CLOPS | 1767 | Cytoplasmic | Nitrate reductase, catalytic subunit, NarA                           |
| sp Q0SRY9 EFP_CLOPS    | 1803 | Cytoplasmic | Elongation factor P, Efp                                             |
| tr Q0SRV2 Q0SRV2_CLOPS | 1841 | Cytoplasmic | Phosphoglucosyltransferase/phosphomannosyltransferase family protein |
| tr Q0SRU2 Q0SRU2_CLOPS | 1851 | Cytoplasmic | Phenylalanine--tRNA ligase beta subunit, PheT                        |
| sp Q0SRT7 RL20_CLOPS   | 1856 | Cytoplasmic | 50S ribosomal protein L20, RplT                                      |
| sp Q0SRT6 RL35_CLOPS   | 1857 | Cytoplasmic | 50S ribosomal protein L35, RplI                                      |
| tr Q0SR56 Q0SR56_CLOPS | 1871 | cytoplasmic | Aspartate-semialdehyde                                               |

|                        |      |             |                                                                         |
|------------------------|------|-------------|-------------------------------------------------------------------------|
|                        |      |             | dehydrogenase, Asd                                                      |
| tr Q0SRS2 Q0SRS2_CLOPS | 1875 | cytoplasmic | Putative cob(I)alamin adenosyltransferase                               |
| tr Q0SRR1 Q0SRR1_CLOPS | 1886 | Cytoplasmic | Valine--tRNA ligase, ValS                                               |
| sp Q0SRP8 SYD_CLOPS    | 1899 | cytoplasmic | Aspartate--tRNA ligase, AspS                                            |
| tr Q0SRM0 Q0SRM0_CLOPS | 1927 | Cytoplasmic | GTPase HflX                                                             |
| tr Q0SRL9 Q0SRL9_CLOPS | 1928 | Cytoplasmic | Hypoxanthine phosphoribosyltransferase, Hpt_1                           |
| tr Q0SRI7 Q0SRI7_CLOPS | 1961 | Cytoplasmic | Dephospho-CoA kinase, CoaE                                              |
| tr Q0SRI3 Q0SRI3_CLOPS | 1965 | Cytoplasmic | Aminopeptidase                                                          |
| tr Q0SRG5 Q0SRG5_CLOPS | 1983 | Cytoplasmic | Pyruvate, phosphate dikinase, PpdK                                      |
| sp Q0SRF3 RS21_CLOPS   | 1995 | Cytoplasmic | 30S ribosomal protein, RpsU                                             |
| tr Q0SRE4 Q0SRE4_CLOPS | 2004 | Cytoplasmic | Chaperone protein DnaJ                                                  |
| sp Q0SRE3 DNAK_CLOPS   | 2005 | Cytoplasmic | Chaperone protein DnaK                                                  |
| tr Q0SRD0 Q0SRD0_CLOPS | 2018 | Cytoplasmic | Stage V sporulation protein AD, SpoVAD                                  |
| sp Q0SRC7 SP2AB_CLOPS  | 2021 | Cytoplasmic | Anti-sigma F factor, SpoIIAB                                            |
| tr Q0SRC1 Q0SRC1_CLOPS | 2027 | Cytoplasmic | Putative manganese-dependent inorganic pyrophosphatase                  |
| tr Q0SRB9 Q0SRB9_CLOPS | 2029 | Cytoplasmic | Glutamate decarboxylase                                                 |
| tr Q0SRA9 Q0SRA9_CLOPS | 2039 | Cytoplasmic | DNA gyrase/topoisomerase IV, A subunit family protein                   |
| tr Q0SR89 Q0SR89_CLOPS | 2059 | cytoplasmic | FemAB family protein                                                    |
| sp Q0SR54 OBG_CLOPS    | 2094 | Cytoplasmic | GTPase obg                                                              |
| sp Q0SR51 RL21_CLOPS   | 2097 | Cytoplasmic | 50S ribosomal protein L21, RplU                                         |
| tr Q0SR48 Q0SR48_CLOPS | 2100 | Cytoplasmic | Radical SAM domain protein                                              |
| tr Q0SR38 Q0SR38_CLOPS | 2110 | Cytoplasmic | Rod shape-determining protein MreB                                      |
| tr Q0SR33 Q0SR33_CLOPS | 2115 | Cytoplasmic | Aminoacyl-histidine dipeptidase, PepD_1                                 |
| tr Q0SR32 Q0SR32_CLOPS | 2116 | Cytoplasmic | Pyruvate kinase, Pyk                                                    |
| sp Q0SR11 SECA_CLOPS   | 2139 | Cytoplasmic | Protein translocase subunit SecA                                        |
| sp Q0SR05 METK_CLOPS   | 2145 | Cytoplasmic | S-adenosylmethionine synthase, MetK                                     |
| sp Q0SQZ4 ATPG_CLOPS   | 2163 | Cytoplasmic | ATP synthase gamma chain, AtpG                                          |
| sp Q0SQZ3 ATPA_CLOPS   | 2164 | Cytoplasmic | ATP synthase subunit alpha, AtpA                                        |
| tr Q0SQY7 Q0SQY7_CLOPS | 2170 | Cytoplasmic | Acetyl-CoA acetyltransferase                                            |
| tr Q0SQY6 Q0SQY6_CLOPS | 2171 | Cytoplasmic | UDP-N-acetylglucosamine 2-epimerase, MnaA                               |
| sp Q0SQY5 UPP_CLOPS    | 2172 | Cytoplasmic | Uracil phosphoribosyltransferase, Upp                                   |
| sp Q0SQY1 RF1_CLOPS    | 2176 | Cytoplasmic | Peptide chain release factor 1, PrfA                                    |
| sp Q0SQX5 PYRG_CLOPS   | 2182 | Cytoplasmic | CTP synthase, PyrG                                                      |
| tr Q0SQW8 Q0SQW8_CLOPS | 2189 | cytoplasmic | LysM domain protein                                                     |
| sp Q0SQS9 G6PI_CLOPS   | 2252 | cytoplasmic | Glucose-6-phosphate isomerase, Pgi                                      |
| tr Q0SQS0 Q0SQS0_CLOPS | 2261 | Cytoplasmic | Inosine-5'-monophosphate dehydrogenase, GuaB                            |
| tr C6UAS4 C6UAS4_CLOPS | 2275 | Cytoplasmic | 60 kDa chaperonin, GroEL                                                |
| tr Q0SQP9 Q0SQP9_CLOPS | 2283 | Cytoplasmic | 3-hydroxybutyryl-CoA dehydrogenase, Hbd                                 |
| tr Q0SQP8 Q0SQP8_CLOPS | 2284 | Cytoplasmic | Electron transfer flavoprotein, alpha subunit/FixB family protein, fixB |
| tr Q0SQP6 Q0SQP6_CLOPS | 2286 | Cytoplasmic | Butyryl-CoA dehydrogenase, Bcd                                          |

|                        |      |             |                                                                       |
|------------------------|------|-------------|-----------------------------------------------------------------------|
| tr Q0SQP5 Q0SQP5_CLOPS | 2287 | Cytoplasmic | 3-hydroxybutyryl-CoA dehydratase ,Crt                                 |
| sp Q0SQP4 REX_CLOPS    | 2288 | Cytoplasmic | Redox-sensing transcriptional repressor Rex                           |
| tr Q0SQN8 Q0SQN8_CLOPS | 2294 | Cytoplasmic | Mannose-1-phosphate guanylyltransferase                               |
| sp Q0SQM4 SYT_CLOPS    | 2317 | Cytoplasmic | Threonine--tRNA ligase, ThrS                                          |
| tr Q0SQL9 Q0SQL9_CLOPS | 2322 | Cytoplasmic | Glutamine--fructose-6-phosphate aminotransferase [isomerizing], GlmS1 |
| tr Q0SQL8 Q0SQL8_CLOPS | 2323 | Cytoplasmic | Rubryerythrin family protein                                          |
| sp Q0SQL7 GLMM_CLOPS   | 2324 | Cytoplasmic | Phosphoglucosamine mutase, GlmM                                       |
| tr Q0SQL0 Q0SQL0_CLOPS | 2332 | Cytoplasmic | Phosphorylase, GlgP                                                   |
| tr Q0SQK1 Q0SQK1_CLOPS | 2341 | Cytoplasmic | Iron hydrogenase, HydA                                                |
| sp Q0SQK0 BUK_CLOPS    | 2342 | cytoplasmic | Probable butyrate kinase, Buk                                         |
| tr Q0SQJ9 Q0SQJ9_CLOPS | 2343 | cytoplasmic | Phosphate butyryltransferase, Ptb                                     |
| tr Q0SQJ2 Q0SQJ2_CLOPS | 2350 | Cytoplasmic | Thioredoxin, Trx                                                      |
| tr Q0SQJ1 Q0SQJ1_CLOPS | 2351 | cytoplasmic | Isoaspartyl dipeptidase , ladA                                        |
| tr Q0SQJ0 Q0SQJ0_CLOPS | 2352 | Cytoplasmic | Phosphoenolpyruvate-protein phosphotransferase, PtsI                  |
| sp Q0SQH9 RS9_CLOPS    | 2363 | Cytoplasmic | 30S ribosomal protein S9, RpsI                                        |
| sp Q0SQH8 RL13_CLOPS   | 2364 | Cytoplasmic | 50S ribosomal protein L13, RplM                                       |
| sp Q0SQH4 RL17_CLOPS   | 2369 | Cytoplasmic | 50S ribosomal protein L17, RplQ                                       |
| sp Q0SQH3 RPOA_CLOPS   | 2370 | Cytoplasmic | DNA-directed RNA polymerase subunit alpha, RpoA                       |
| sp Q0SQH2 RS4A_CLOPS   | 2371 | Cytoplasmic | 30S ribosomal protein S4 A, RpsD                                      |
| sp Q0SQH1 RS11_CLOPS   | 2372 | Cytoplasmic | 30S ribosomal protein S11, RpsK                                       |
| sp Q0SQH0 RS13_CLOPS   | 2373 | Cytoplasmic | 30S ribosomal protein S13, RpsM                                       |
| sp Q0SQG1 RS5_CLOPS    | 2382 | Cytoplasmic | 30S ribosomal protein S5, RpsE                                        |
| sp Q0SQG0 RL18_CLOPS   | 2383 | Cytoplasmic | 50S ribosomal protein L18, RplR                                       |
| sp Q0SQF9 RL6_CLOPS    | 2384 | Cytoplasmic | 50S ribosomal protein L6, RplF                                        |
| sp Q0SQF8 RS8_CLOPS    | 2385 | Cytoplasmic | 30S ribosomal protein S8, RpsH                                        |
| sp Q0SQF6 RL5_CLOPS    | 2387 | Cytoplasmic | 50S ribosomal protein L5, RplE                                        |
| sp Q0SQF5 RL24_CLOPS   | 2388 | Cytoplasmic | 50S ribosomal protein L24, RplX                                       |
| sp Q0SQF4 RL14_CLOPS   | 2389 | Cytoplasmic | 50S ribosomal protein L14, RplN                                       |
| sp Q0SQF3 RS17_CLOPS   | 2390 | Cytoplasmic | 30S ribosomal protein S17, RpsQ                                       |
| sp Q0SQF1 RL16_CLOPS   | 2392 | Cytoplasmic | 50S ribosomal protein L16, RplP                                       |
| sp Q0SQF0 RS3_CLOPS    | 2393 | Cytoplasmic | 30S ribosomal protein S3, RpsC                                        |
| sp Q0SQE9 RL22_CLOPS   | 2394 | Cytoplasmic | 50S ribosomal protein L22, RplV                                       |
| sp Q0SQE8 RS19_CLOPS   | 2395 | Cytoplasmic | 30S ribosomal protein S19, RpsS                                       |
| sp Q0SQE4 RL3_CLOPS    | 2399 | cytoplasmic | 50S ribosomal protein L3, RplC                                        |
| sp Q0SQC8 EFTU_CLOPS   | 2402 | cytoplasmic | Elongation factor Tu, Tuf1                                            |
| sp Q0SQE1 EFG_CLOPS    | 2403 | Cytoplasmic | Elongation factor G, Fusa                                             |
| sp Q0SQD9 RS12_CLOPS   | 2405 | Cytoplasmic | 30S ribosomal protein S12, RpsL                                       |
| sp Q0SQD7 RPOC_CLOPS   | 2407 | Cytoplasmic | DNA-directed RNA polymerase subunit beta, RpoC                        |
| sp Q0SQD6 RPOB_CLOPS   | 2408 | Cytoplasmic | DNA-directed RNA polymerase subunit beta, RpoB                        |
| tr Q0SQD4 Q0SQD4_CLOPS | 2410 | Cytoplasmic | 50S ribosomal protein L10, RplJ                                       |
| sp Q0SQD3 RL1_CLOPS    | 2411 | Cytoplasmic | 50S ribosomal protein L1, RplA                                        |

|                        |      |                      |                                                                |
|------------------------|------|----------------------|----------------------------------------------------------------|
| sp Q0SQD2 RL11_CLOPS   | 2412 | Cytoplasmic          | 50S ribosomal protein L11, RplK                                |
| tr Q0SQC4 Q0SQC4_CLOPS | 2421 | Cytoplasmic          | Thymidylate synthase ThyX                                      |
| sp Q0SQC1 SYC_CLOPS    | 2424 | Cytoplasmic          | Cysteine--tRNA ligase, CysS                                    |
| sp Q0SQC0 SYP_CLOPS    | 2425 | Cytoplasmic          | Proline--tRNA ligase, ProS                                     |
| tr Q0SQB1 Q0SQB1_CLOPS | 2434 | Cytoplasmic          | Glyceraldehyde-3-phosphate dehydrogenase, NADP-dependent, GapN |
| tr Q0SQ95 Q0SQ95_CLOPS | 2450 | Cytoplasmic          | Amidohydrolase homolog                                         |
| tr Q0SQ87 Q0SQ87_CLOPS | 2465 | Cytoplasmic          | Glycine--tRNA ligase, GlyS                                     |
| sp Q0SQ86 SYK_CLOPS    | 2467 | Cytoplasmic          | Lysine--tRNA ligase, LysS                                      |
| tr Q0SQ69 Q0SQ69_CLOPS | 2491 | Cytoplasmic          | Stage V sprulation protein T, SpoVT                            |
| tr Q0SQ67 Q0SQ67_CLOPS | 2493 | Cytoplasmic          | Transcription-repair coupling factor, Mfd                      |
| tr Q0SQ62 Q0SQ62_CLOPS | 2498 | Cytoplasmic          | Ribose-phosphate pyrophosphokinase, PrsA                       |
| sp Q0SQ51 SYN_CLOPS    | 2509 | cytoplasmic          | Asparagine--tRNA ligase, AsnS                                  |
| sp Q0SQ50 AMPA_CLOPS   | 2510 | cytoplasmic          | Probable cytosol aminopeptidase, PepA                          |
| tr Q0SQ42 Q0SQ42_CLOPS | 2518 | Cytoplasmic          | DegV family protein                                            |
| tr Q0SQ35 Q0SQ35_CLOPS | 2525 | Cytoplasmic          | Uncharacterized protein                                        |
| tr Q0SQ27 Q0SQ27_CLOPS | 2533 | Cytoplasmic          | Methionine--tRNA ligase, MetG_2                                |
| tr Q0SQ21 Q0SQ21_CLOPS | 2539 | Cytoplasmic          | Xaa-pro aminopeptidase, PepP                                   |
| tr Q0SQ20 Q0SQ20_CLOPS | 2540 | Cytoplasmic          | Aldehyde-alcohol dehydrogenase, AdhE                           |
| tr Q0SQ10 Q0SQ10_CLOPS | 2550 | Cytoplasmic          | Isoleucine--tRNA ligase, IleS                                  |
| sp Q0SQ01 GLPK_CLOPS   | 2559 | Cytoplasmic          | Glycerol kinase, GlpK                                          |
| tr Q0SPZ6 Q0SPZ6_CLOPS | 2564 | Cytoplasmic          | Putative lipoprotein                                           |
| tr Q0SPY7 Q0SPY7_CLOPS | 2573 | Cytoplasmic          | Putative glutamine synthetase                                  |
| sp Q0SPX8 PROA_CLOPS   | 2582 | Cytoplasmic          | Gamma-glutamyl phosphate reductase, ProA                       |
| tr Q0SPX6 Q0SPX6_CLOPS | 2584 | Cytoplasmic          | Oxidoreductase, short chain dehydrogenase/reductase family     |
| tr Q0SPU4 Q0SPU4_CLOPS | 2616 | Cytoplasmic          | UDP-N-acetylglucosamine 1-carboxyvinyltransferase, MurA_2      |
| tr Q0SPT1 Q0SPT1_CLOPS | 2641 | Cytoplasmic          | Adenylosuccinate synthetase, PurA                              |
| tr Q0SPS1 Q0SPS1_CLOPS | 2651 | Cytoplasmic          | DHH family protein                                             |
| sp Q0SPR8 RS18_CLOPS   | 2654 | Cytoplasmic          | 30S ribosomal protein S18 ,RpsR                                |
| tr Q0SPQ8 Q0SPQ8_CLOPS | 2664 | Cytoplasmic          | Uncharacterized protein                                        |
| sp Q0SPP8 RL34_CLOPS   | 2674 | Cytoplasmic          | 50S ribosomal protein L34, RpmH                                |
| sp Q0SWW1 PDRP_CLOPS   | 0076 | Cytoplasmic membrane | Putative pyruvate, phosphate dikinase regulatory protein       |
| tr Q0SWR9 Q0SWR9_CLOPS | 0093 | Cytoplasmic Membrane | PTS system, N-acetylglucosamine-specific IIBC component, NagE  |
| tr Q0SWK4 Q0SWK4_CLOPS | 0159 | Cytoplasmic Membrane | Arginine/ornithine antiporter, ArcD                            |
| tr Q0SWI7 Q0SWI7_CLOPS | 0176 | Cytoplasmic Membrane | Sodium:solute transporter                                      |
| tr Q0SWD6 Q0SWD6_CLOPS | 0230 | Cytoplasmic Membrane | Uncharacterized protein                                        |
| tr Q0SWC5 Q0SWC5_CLOPS | 0241 | Cytoplasmic Membrane | Uncharacterized protein                                        |
| tr Q0SW99 Q0SW99_CLOPS | 0271 | Cytoplasmic Membrane | Putative transcriptional regulator                             |
| tr Q0SW79 Q0SW79_CLOPS | 0292 | Cytoplasmic Membrane | Cell division protein FtsX                                     |
| tr Q0SW78 Q0SW78_CLOPS | 0293 | Cytoplasmic Membrane | Carboxyl-terminal protease                                     |
| tr Q0SW39 Q0SW39_CLOPS | 0332 | Cytoplasmic Membrane | Putative penicillin-binding protein                            |



|                        |      |                      |                                                                |
|------------------------|------|----------------------|----------------------------------------------------------------|
| tr Q0SW08 Q0SW08_CLOPS | 0363 | Cytoplasmic Membrane | ABC transporter, permease/ATP-binding protein                  |
| tr Q0SW07 Q0SW07_CLOPS | 0364 | Cytoplasmic Membrane | ABC transporter, permease/ATP-binding protein                  |
| tr Q0SVX2 Q0SVX2_CLOPS | 0399 | Cytoplasmic Membrane | PTS system, mannose/fructose/sorbose family, IID component     |
| tr Q0SVV6 Q0SVV6_CLOPS | 0415 | Cytoplasmic Membrane | Uncharacterized protein                                        |
| tr Q0SVV3 Q0SVV3_CLOPS | 0418 | Cytoplasmic Membrane | PTS system, IIBC component                                     |
| tr Q0SVU0 Q0SVU0_CLOPS | 0431 | Cytoplasmic Membrane | Uncharacterized protein                                        |
| tr Q0SVP6 Q0SVP6_CLOPS | 0476 | Cytoplasmic Membrane | ABC transporter, substrate-binding protein                     |
| tr Q0SVP5 Q0SVP5_CLOPS | 0477 | Cytoplasmic Membrane | ABC transporter, permease protein                              |
| tr Q0SVP4 Q0SVP4_CLOPS | 0478 | Cytoplasmic Membrane | ABC transporter, permease protein                              |
| tr Q0SVJ4 Q0SVJ4_CLOPS | 0528 | Cytoplasmic Membrane | Stage V sporulation protein D                                  |
| tr Q0SVF9 Q0SVF9_CLOPS | 0564 | Cytoplasmic Membrane | Signal peptidase I                                             |
| tr Q0SVF8 Q0SVF8_CLOPS | 0565 | Cytoplasmic Membrane | ATP-dependent zinc metalloprotease FtsH                        |
| tr Q0SVC5 Q0SVC5_CLOPS | 0598 | Cytoplasmic Membrane | Cell envelope-related transcriptional attenuator domain family |
| tr Q0SVC0 Q0SVC0_CLOPS | 0603 | Cytoplasmic Membrane | Phosphate ABC transporter, phosphate-binding protein, PstS_1   |
| sp Q0SVB6 PSTB_CLOPS   | 0607 | Cytoplasmic Membrane | Phosphate import ATP-binding protein PstB                      |
| tr Q0SVA9 Q0SVA9_CLOPS | 0614 | Cytoplasmic Membrane | Spore germination protein                                      |
| tr Q0SVA8 Q0SVA8_CLOPS | 0615 | Cytoplasmic Membrane | Spore germination protein, GerABKA family                      |
| tr Q0SV26 Q0SV26_CLOPS | 0698 | Cytoplasmic Membrane | ABC transporter, ATP-binding protein                           |
| tr Q0SV08 Q0SV08_CLOPS | 0716 | Cytoplasmic Membrane | YeeE/YedE family protein                                       |
| tr Q0SUS7 Q0SUS7_CLOPS | 0805 | Cytoplasmic Membrane | PTS system, mannose/fructose/sorbose family, IIC component     |
| tr Q0SUS6 Q0SUS6_CLOPS | 0806 | Cytoplasmic Membrane | PTS system, mannose/fructose/sorbose family, IID component     |
| tr Q0SUR3 Q0SUR3_CLOPS | 0819 | Cytoplasmic Membrane | Antibiotic ABC transporter, permease protein                   |
| tr Q0SUM3 Q0SUM3_CLOPS | 0859 | Cytoplasmic Membrane | Uncharacterized protein                                        |
| tr Q0SUH9 Q0SUH9_CLOPS | 0904 | Cytoplasmic Membrane | Substrate-binding protein MsmE                                 |
| tr Q0SUE8 Q0SUE8_CLOPS | 0935 | Cytoplasmic Membrane | PTS system, N-acetylglucosamine-specific IIBC component, NagE  |
| tr Q0SUA1 Q0SUA1_CLOPS | 0983 | Cytoplasmic Membrane | Cation efflux family protein                                   |
| tr Q0SU83 Q0SU83_CLOPS | 1001 | Cytoplasmic Membrane | Glycerol uptake facilitator protein, GlpE                      |
| tr Q0SU32 Q0SU32_CLOPS | 1053 | Cytoplasmic Membrane | GerA spore germination protein                                 |
| tr Q0SU31 Q0SU31_CLOPS | 1054 | Cytoplasmic Membrane | C4-dicarboxylate anaerobic carrier family protein              |
| tr Q0STX0 Q0STX0_CLOPS | 1115 | Cytoplasmic Membrane | Iron compound ABC transporter, iron-binding protein            |
| tr Q0STU6 Q0STU6_CLOPS | 1139 | Cytoplasmic Membrane | 3-oxoacyl-[acyl-carrier-protein] synthase 2, FabF              |
| tr Q0STF9 Q0STF9_CLOPS | 1276 | Cytoplasmic Membrane | Oligopeptide transporter, OPT family                           |
| tr Q0STE2 Q0STE2_CLOPS | 1293 | Cytoplasmic Membrane | Preprotein translocase, SecG subunit                           |
| tr Q0STA8 Q0STA8_CLOPS | 1329 | Cytoplasmic Membrane | CDP-diacylglycerol--serine O-                                  |

|                        |      |                      |                                                                          |
|------------------------|------|----------------------|--------------------------------------------------------------------------|
|                        |      |                      | phosphatidyltransferase, PssA                                            |
| tr Q0ST94 Q0ST94_CLOPS | 1343 | Cytoplasmic Membrane | Galactoside ABC transporter, permease protein, MglC                      |
| tr Q0ST89 Q0ST89_CLOPS | 1348 | Cytoplasmic Membrane | Uncharacterized protein                                                  |
| tr Q0SSP8 Q0SSP8_CLOPS | 1542 | Cytoplasmic Membrane | Phage shock protein A, PspA                                              |
| tr Q0SSH8 Q0SSH8_CLOPS | 1613 | Cytoplasmic Membrane | V-type ATPase, K subunit                                                 |
| tr Q0SSH7 Q0SSH7_CLOPS | 1614 | Cytoplasmic Membrane | V-type ATPase, I subunit                                                 |
| tr Q0SSE6 Q0SSE6_CLOPS | 1646 | Cytoplasmic Membrane | CDP-diacylglycerol--glycerol-3-phosphate 3-phosphatidyltransferase, PgsA |
| tr Q0SSC7 Q0SSC7_CLOPS | 1665 | Cytoplasmic Membrane | RIP metalloprotease RseP                                                 |
| tr Q0SS83 Q0SS83_CLOPS | 1709 | Cytoplasmic Membrane | Serine/threonine protein kinase BH2504                                   |
| tr Q0SS79 Q0SS79_CLOPS | 1713 | Cytoplasmic Membrane | Putative neutral zinc metalloproteinase                                  |
| sp Q0SS66 DER_CLOPS    | 1726 | Cytoplasmic Membrane | GTPase Der                                                               |
| tr Q0SS49 Q0SS49_CLOPS | 1743 | Cytoplasmic Membrane | Uncharacterized protein                                                  |
| tr Q0SS48 Q0SS48_CLOPS | 1744 | Cytoplasmic Membrane | GTP-binding protein TypA                                                 |
| tr Q0SRW8 Q0SRW8_CLOPS | 1824 | Cytoplasmic Membrane | Small basic protein, Sbp                                                 |
| tr Q0SRP0 Q0SRP0_CLOPS | 1907 | Cytoplasmic Membrane | Protein-export membrane protein SecF                                     |
| tr Q0SRN9 Q0SRN9_CLOPS | 1908 | Cytoplasmic Membrane | Protein translocase subunit SecD                                         |
| tr Q0SRN6 Q0SRN6_CLOPS | 1911 | Cytoplasmic Membrane | Preprotein translocase, YajC_2                                           |
| sp Q0SRL7 PBPA_CLOPS   | 1930 | Cytoplasmic Membrane | Penicillin-binding protein 1A, PbpA                                      |
| tr Q0SRL6 Q0SRL6_CLOPS | 1931 | Cytoplasmic membrane | Sodium:alanine symporter family protein                                  |
| tr Q0SRL1 Q0SRL1_CLOPS | 1936 | Cytoplasmic Membrane | Spermidine/putrescine ABC transporter, permease protein PotB             |
| tr Q0SRK4 Q0SRK4_CLOPS | 1943 | Cytoplasmic Membrane | D-alanyl-D-alanine carboxypeptidase family protein                       |
| tr Q0SRG7 Q0SRG7_CLOPS | 1981 | Cytoplasmic Membrane | Putative permease                                                        |
| sp Q0SRD8 LEPA_CLOPS   | 2010 | Cytoplasmic Membrane | Elongation factor 4, LepA                                                |
| tr Q0SRD1 Q0SRD1_CLOPS | 2017 | Cytoplasmic Membrane | Stage V sporulation protein AE, SpoVAE                                   |
| tr Q0SRC9 Q0SRC9_CLOPS | 2019 | Cytoplasmic Membrane | Stage V sporulation protein AC, SpoVAC                                   |
| sp Q0SRB4 MURG_CLOPS   | 2034 | Cytoplasmic Membrane | MURG transferasetransferase                                              |
| tr Q0SR43 Q0SR43_CLOPS | 2105 | Cytoplasmic Membrane | Site-determining protein, MinD                                           |
| tr Q0SR25 Q0SR25_CLOPS | 2123 | Cytoplasmic Membrane | MutS domain protein                                                      |
| tr Q0SR24 Q0SR24_CLOPS | 2124 | Cytoplasmic Membrane | PTS system, glucose-specific IIBC component, PtsG                        |
| tr Q0SR23 Q0SR23_CLOPS | 2125 | Cytoplasmic Membrane | ABC transporter, substrate-binding protein                               |
| sp Q0SQZ5 ATPB_CLOPS   | 2162 | Cytoplasmic Membrane | ATP synthase subunit beta, AtpD                                          |
| sp Q0SQZ1 ATPF_CLOPS   | 2166 | Cytoplasmic Membrane | ATP synthase subunit b, AtpF                                             |
| tr Q0SQY9 Q0SQY9_CLOPS | 2168 | Cytoplasmic Membrane | ATP synthase subunit a, AtpB                                             |
| tr Q0SQX6 Q0SQX6_CLOPS | 2181 | Cytoplasmic Membrane | Transcription termination factor Rho                                     |
| tr Q0SQW9 Q0SQW9_CLOPS | 2188 | Cytoplasmic Membrane | Cyanophycinase, CphB                                                     |
| tr Q0SQS7 Q0SQS7_CLOPS | 2254 | Cytoplasmic Membrane | Oligopeptide/dipeptide ABC transporter, ATP-binding protein              |
| tr Q0SQS2 Q0SQS2_CLOPS | 2259 | Cytoplasmic Membrane | Major facilitator family transporter                                     |
| tr Q0SQP3 Q0SQP3_CLOPS | 2289 | Cytoplasmic Membrane | Zinc-transporting atpase                                                 |
| tr Q0SQK2 Q0SQK2_CLOPS | 2340 | Cytoplasmic Membrane | ABC transporter, ATP-binding protein                                     |
| tr Q0SQG4 Q0SQG4_CLOPS | 2379 | Cytoplasmic Membrane | Protein translocase subunit SecY                                         |

|                        |      |                      |                                                                   |
|------------------------|------|----------------------|-------------------------------------------------------------------|
| tr Q0SQB8 Q0SQB8_CLOPS | 2427 | Cytoplasmic Membrane | PIN/TRAM domain protein                                           |
| tr Q0SQ81 Q0SQ81_CLOPS | 2472 | Cytoplasmic Membrane | ATP-dependent zinc metalloprotease FtsH                           |
| sp Q0SQ68 PRSA_CLOPS   | 2492 | Cytoplasmic Membrane | Foldase protein PrsA                                              |
| tr Q0SQ55 Q0SQ55_CLOPS | 2505 | Cytoplasmic Membrane | Nucleoside transporter, NupC family                               |
| tr Q0SPX4 Q0SPX4_CLOPS | 2586 | Cytoplasmic Membrane | Xanthine/uracil permease family protein                           |
| tr Q0SPW7 Q0SPW7_CLOPS | 2593 | Cytoplasmic Membrane | Putative phage infection protein                                  |
| tr Q0SPW6 Q0SPW6_CLOPS | 2594 | Cytoplasmic Membrane | Putative phage infection protein                                  |
| tr Q0SPQ1 Q0SPQ1_CLOPS | 2671 | Cytoplasmic Membrane | Membrane protein OxaA                                             |
| tr Q0STI4 Q0STI4_CLOPS | 1251 | extracellular        | Superoxide dismutase, SodF                                        |
| tr Q0STC4 Q0STC4_CLOPS | 1311 | extracellular        | Glycosyl hydrolase, family 25                                     |
| tr Q0SWT8 Q0SWT8_CLOPS | 0030 | unknown              | DegV family protein                                               |
| sp Q0SWN5 CINA_CLOPS   | 0128 | unknown              | Putative competence-damage inducible protein, CinA                |
| tr Q0SWH6 Q0SWH6_CLOPS | 0188 | unknown              | 5'-nucleotidase, lipoprotein e(P4) family                         |
| tr Q0SW97 Q0SW97_CLOPS | 0273 | unknown              | UDP-glucose 4-epimerase, GalE_1                                   |
| tr Q0SW33 Q0SW33_CLOPS | 0338 | unknown              | Putative lipoprotein                                              |
| tr Q0SVR9 Q0SVR9_CLOPS | 0452 | unknown              | Capsule chain length determinant protein                          |
| tr Q0SVM0 Q0SVM0_CLOPS | 0502 | unknown              | Putative lipoprotein                                              |
| tr Q0SUS5 Q0SUS5_CLOPS | 0807 | unknown              | Uncharacterized protein                                           |
| tr Q0SU80 Q0SU80_CLOPS | 1004 | unknown              | Glycerol dehydratase, large subunit, DhaB                         |
| tr Q0STY5 Q0STY5_CLOPS | 1100 | unknown              | Putative lipoprotein                                              |
| tr Q0STM6 Q0STM6_CLOPS | 1209 | unknown              | VanW-related protein                                              |
| tr Q0STC9 Q0STC9_CLOPS | 1306 | unknown              | Lipoprotein, BMP family                                           |
| tr Q0STC5 Q0STC5_CLOPS | 1310 | unknown              | VanW-like family protein                                          |
| tr Q0STB8 Q0STB8_CLOPS | 1319 | unknown              | 1-acyl-sn-glycerol-3-phosphate acyltransferase family protein     |
| tr Q0ST96 Q0ST96_CLOPS | 1341 | unknown              | Putative galactoside ABC transporter, galactoside-binding protein |
| tr Q0ST88 Q0ST88_CLOPS | 1349 | unknown              | Uncharacterized protein                                           |
| tr Q0ST82 Q0ST82_CLOPS | 1355 | unknown              | Uncharacterized protein                                           |
| tr Q0SSX2 Q0SSX2_CLOPS | 1466 | unknown              | Uncharacterized protein                                           |
| tr Q0SST6 Q0SST6_CLOPS | 1502 | unknown              | Uncharacterized protein                                           |
| tr Q0SSN8 Q0SSN8_CLOPS | 1552 | unknown              | Lipoprotein, BMP family                                           |
| tr Q0SSE2 Q0SSE2_CLOPS | 1650 | unknown              | Aspartokinase                                                     |
| tr Q0SS80 Q0SS80_CLOPS | 1712 | unknown              | Ribosomal RNA small subunit methyltransferase B, Sun              |
| tr Q0SS20 Q0SS20_CLOPS | 1772 | unknown              | Uncharacterized protein                                           |
| tr Q0SRV7 Q0SRV7_CLOPS | 1836 | unknown              | Delta-lactam-biosynthetic de-N-acetylase, PdaA                    |
| tr Q0SRI6 Q0SRI6_CLOPS | 1962 | unknown              | DNA polymerase, PolA                                              |
| tr Q0SRG6 Q0SRG6_CLOPS | 1982 | unknown              | Uncharacterized protein                                           |
| tr Q0SRC3 Q0SRC3_CLOPS | 2025 | unknown              | Uncharacterized protein                                           |
| tr Q0SRB6 Q0SRB6_CLOPS | 2032 | unknown              | Pyruvate-flavodoxin oxidoreductase, NifJ                          |
| tr Q0SR94 Q0SR94_CLOPS | 2054 | unknown              | Molybdate ABC transporter, molybdate-binding protein, ModA        |

|                        |      |         |                                                                                     |
|------------------------|------|---------|-------------------------------------------------------------------------------------|
| tr Q0SR41 Q0SR41_CLOPS | 2107 | unknown | Putative penicillin-binding protein                                                 |
| tr Q0SQV7 Q0SQV7_CLOPS | 2200 | unknown | Serine protease                                                                     |
| tr Q0SQR1 Q0SQR1_CLOPS | 2270 | unknown | Prepilin-type N-terminal cleavage/methylation domain protein                        |
| tr Q0SQP7 Q0SQP7_CLOPS | 2285 | unknown | Electron transfer flavoprotein, beta subunit/FixA family protein                    |
| tr Q0SQK4 Q0SQK4_CLOPS | 2338 | unknown | Putative maltose/maltodextrin ABC transporter, maltose/maltodextrin-binding protein |
| tr Q0SQJ7 Q0SQJ7_CLOPS | 2345 | unknown | Uncharacterized protein                                                             |
| sp Q0SQG3 RL15_CLOPS   | 2380 | unknown | 50S ribosomal protein L15, RplO                                                     |
| sp Q0SQE7 RL2_CLOPS    | 2396 | unknown | 50S ribosomal protein L2, RplB                                                      |
| sp Q0SQE5 RL4_CLOPS    | 2398 | unknown | 50S ribosomal protein L4, RplD                                                      |
| sp Q0SQ58 MURC_CLOPS   | 2502 | unknown | UDP-N-acetylmuramate--L-alanine ligase, MurC                                        |
| tr Q0SQ56 Q0SQ56_CLOPS | 2504 | unknown | Purine nucleoside phosphorylase, PunA                                               |
| tr Q0SQ30 Q0SQ30_CLOPS | 2530 | unknown | Uncharacterized protein                                                             |
| tr Q0SPZ4 Q0SPZ4_CLOPS | 2566 | unknown | Spore cortex-lytic enzyme SleC                                                      |
| tr Q0SPY2 Q0SPY2_CLOPS | 2578 | unknown | Conserved domain protein                                                            |
| tr Q0SPX1 Q0SPX1_CLOPS | 2589 | unknown | Conserved domain protein                                                            |

**Table S2. Total proteins detected in germinated spore membrane samples**

| UniProt ID             | gene name (CPR_) | protein localization <sup>a</sup> | protein function                                                               |
|------------------------|------------------|-----------------------------------|--------------------------------------------------------------------------------|
| tr Q0SQS3 Q0SQS3_CLOPS | 2258             | cell wall                         | Oligopeptide/dipeptide ABC transporter, oligopeptide/dipeptide-binding protein |
| tr Q0SWX7 Q0SWX7_CLOPS | 0002             | Cytoplasmic                       | DNA polymerase III subunit beta, DnaN                                          |
| sp Q0SWW9 SYS_CLOPS    | 0014             | Cytoplasmic                       | Serine--tRNA ligase, SerS                                                      |
| tr Q0SWX5 Q0SWX5_CLOPS | 0015             | Cytoplasmic                       | Uncharacterized protein                                                        |
| tr Q0SWZ0 Q0SWZ0_CLOPS | 0082             | Cytoplasmic                       | Glycogen synthase, GlgA                                                        |
| tr Q0SWY9 Q0SWY9_CLOPS | 0083             | Cytoplasmic                       | Phosphorylase                                                                  |
| sp Q0SWS5 GLGC_CLOPS   | 0086             | Cytoplasmic                       | Glucose-1-phosphate adenylyltransferase, GlgC                                  |
| tr Q0SWS4 Q0SWS4_CLOPS | 0087             | Cytoplasmic                       | Glucose-1-phosphate adenylyltransferase, GlgD                                  |
| tr Q0SWS0 Q0SWS0_CLOPS | 0092             | Cytoplasmic                       | Putative PTS system, N-acetylglucosamine-specific IIA component                |
| tr Q0SWR5 Q0SWR5_CLOPS | 0098             | Cytoplasmic                       | Putative glucokinase                                                           |
| tr Q0SWR4 Q0SWR4_CLOPS | 0099             | Cytoplasmic                       | Rubredoxin/rubrerythrin                                                        |
| tr Q0SWN1 Q0SWN1_CLOPS | 0132             | Cytoplasmic                       | Rubrerythrin, Rbr_1                                                            |
| sp Q0SWK5 OTC_CLOPS    | 0158             | Cytoplasmic                       | Ornithine carbamoyltransferase, ArcB                                           |
| tr Q0SWJ0 Q0SWJ0_CLOPS | 0173             | Cytoplasmic                       | Nitroreductase family protein                                                  |
| tr Q0SWG2 Q0SWG2_CLOPS | 0203             | Cytoplasmic                       | Heme oxygenase                                                                 |
| tr Q0SWB7 Q0SWB7_CLOPS | 0251             | Cytoplasmic                       | AhpC/TSA family protein                                                        |
| tr Q0SWB3 Q0SWB3_CLOPS | 0256             | Cytoplasmic                       | Glycosyl transferase, group 1 family protein                                   |
| tr Q0SWA8 Q0SWA8_CLOPS | 0261             | Cytoplasmic                       | [Fe] hydrogenase                                                               |
| tr Q0SW95 Q0SW95_CLOPS | 0275             | Cytoplasmic                       | Metallo-beta-lactamase family/flavodoxin                                       |
| tr Q0SW87 Q0SW87_CLOPS | 0284             | Cytoplasmic                       | Uncharacterized protein                                                        |
| tr Q0SW84 Q0SW84_CLOPS | 0287             | Cytoplasmic                       | Putative transketolase, N-terminal subunit                                     |
| tr Q0SW83 Q0SW83_CLOPS | 0288             | Cytoplasmic                       | Putative transketolase, C-terminal subunit                                     |
| tr Q0SW42 Q0SW42_CLOPS | 0329             | Cytoplasmic                       | UvrABC system protein A, UvrA                                                  |
| tr Q0SW30 Q0SW30_CLOPS | 0341             | Cytoplasmic                       | 6-phosphofructokinase, PfkA                                                    |
| tr Q0SW29 Q0SW29_CLOPS | 0342             | Cytoplasmic                       | Pyruvate kinase, Pyk_1                                                         |
| sp Q0SW00 DEOB_CLOPS   | 0371             | Cytoplasmic                       | Phosphopentomutase, DeoB                                                       |
| tr Q0SVV7 Q0SVV7_CLOPS | 0414             | Cytoplasmic                       | Uncharacterized protein                                                        |
| tr Q0SVT9 Q0SVT9_CLOPS | 0432             | Cytoplasmic                       | Uncharacterized protein                                                        |
| tr Q0SVQ3 Q0SVQ3_CLOPS | 0468             | Cytoplasmic                       | UDP-glucose 4-epimerase, GalE_2                                                |
| tr Q0SVL0 Q0SVL0_CLOPS | 0512             | Cytoplasmic                       | Nitrite/sulfite reductase homolog                                              |
| tr Q0SVK3 Q0SVK3_CLOPS | 0519             | Cytoplasmic                       | FMN-dependent NADH-azoreductase, AzoR                                          |

|                        |      |             |                                                            |
|------------------------|------|-------------|------------------------------------------------------------|
| tr Q0SVH4 Q0SVH4_CLOPS | 0548 | Cytoplasmic | Uncharacterized protein                                    |
| tr Q0SVE6 Q0SVE6_CLOPS | 0577 | Cytoplasmic | M18 family aminopeptidase                                  |
| tr Q0SVA5 Q0SVA5_CLOPS | 0618 | Cytoplasmic | Uncharacterized protein                                    |
| sp Q0SVA4 SYY_CLOPS    | 0619 | Cytoplasmic | Tyrosine--tRNA ligase, TyrS                                |
| tr Q0SV42 Q0SV42_CLOPS | 0682 | Cytoplasmic | Rubredoxin/rubrerythrin                                    |
| sp Q0SV41 TAL_CLOPS    | 0683 | Cytoplasmic | Probable transaldolase, Tal                                |
| tr Q0SUZ0 Q0SUZ0_CLOPS | 0734 | Cytoplasmic | Uncharacterized protein                                    |
| sp Q0SUV5 AZOR_CLOPS   | 0777 | Cytoplasmic | FMN-dependent NADH-azoreductase, AzoR                      |
| tr Q0SUS8 Q0SUS8_CLOPS | 0804 | Cytoplasmic | PTS system, mannose/fructose/sorbose family, IIB component |
| tr Q0SUP2 Q0SUP2_CLOPS | 0840 | Cytoplasmic | Rubrerythrin, Rbr_2                                        |
| tr Q0SUP0 Q0SUP0_CLOPS | 0842 | Cytoplasmic | Nadh-dependent butanol dehydrogenase a                     |
| tr Q0SUM4 Q0SUM4_CLOPS | 0858 | Cytoplasmic | Acetyltransferase, GNAT family                             |
| tr Q0SUH5 Q0SUH5_CLOPS | 0908 | Cytoplasmic | Sucrose-6-phosphate hydrolase                              |
| tr Q0SUE9 Q0SUE9_CLOPS | 0934 | Cytoplasmic | Spore coat peptide assembly protein CotJc                  |
| tr Q0SUB0 Q0SUB0_CLOPS | 0974 | Cytoplasmic | Hydroxylamine reductase, Hcp                               |
| tr Q0SU99 Q0SU99_CLOPS | 0985 | Cytoplasmic | Uncharacterized protein                                    |
| tr Q0SU73 Q0SU73_CLOPS | 1011 | Cytoplasmic | 1,3-propanediol dehydrogenase, DhaT                        |
| tr Q0SU58 Q0SU58_CLOPS | 1026 | Cytoplasmic | Glutathione peroxidase                                     |
| tr Q0SU57 Q0SU57_CLOPS | 1027 | Cytoplasmic | Collagen triple helix repeat protein                       |
| tr Q0SU38 Q0SU38_CLOPS | 1047 | Cytoplasmic | Ferritin family protein                                    |
| tr Q0SU24 Q0SU24_CLOPS | 1061 | cytoplasmic | Oxidoreductase, 2-nitropropane dioxygenase family          |
| sp Q0SU11 HPRK_CLOPS   | 1074 | Cytoplasmic | HPr kinase/phosphorylase, HprK                             |
| tr Q0SU06 Q0SU06_CLOPS | 1079 | Cytoplasmic | Uncharacterized protein                                    |
| tr Q0SU05 Q0SU05_CLOPS | 1080 | Cytoplasmic | Uncharacterized protein                                    |
| tr Q0STY1 Q0STY1_CLOPS | 1104 | Cytoplasmic | Uncharacterized protein                                    |
| tr Q0STV6 Q0STV6_CLOPS | 1129 | Cytoplasmic | Tetratricopeptide repeat protein                           |
| tr Q0STV5 Q0STV5_CLOPS | 1130 | Cytoplasmic | Glutamine-dependent NAD(+) synthetase, NadE                |
| tr Q0STV3 Q0STV3_CLOPS | 1132 | Cytoplasmic | SPFH domain protein/band 7 family protein                  |
| sp Q0STU9 FABH_CLOPS   | 1136 | Cytoplasmic | 3-oxoacyl-[acyl-carrier-protein] synthase 3, FabH          |
| tr Q0STU8 Q0STU8_CLOPS | 1137 | Cytoplasmic | Malonyl CoA-acyl carrier protein transacylase, FabD        |
| tr Q0STU7 Q0STU7_CLOPS | 1138 | Cytoplasmic | 3-oxoacyl-[acyl-carrier-protein] reductase, FabG           |
| sp Q0STU4 FABZ_CLOPS   | 1141 | Cytoplasmic | 3-hydroxyacyl-[acyl-carrier-protein] dehydratase FabZ      |
| tr Q0STU3 Q0STU3_CLOPS | 1142 | Cytoplasmic | Acetyl-CoA carboxylase, biotin carboxylase subunit, AccC   |
| tr Q0STR6 Q0STR6_CLOPS | 1169 | Cytoplasmic | Formate acetyltransferase, Pfl                             |
| tr Q0STQ4 Q0STQ4_CLOPS | 1181 | Cytoplasmic | Threonine dehydratase, catabolic,                          |

|                        |      |             |                                                                   |
|------------------------|------|-------------|-------------------------------------------------------------------|
|                        |      |             | TdcB                                                              |
| tr Q0STN2 Q0STN2_CLOPS | 1203 | Cytoplasmic | 6-phosphofructokinase, PfkA                                       |
| tr Q0STM9 Q0STM9_CLOPS | 1206 | Cytoplasmic | UDP-N-acetylmuramyl tripeptide synthetase MurC homolog            |
| tr Q0STM0 Q0STM0_CLOPS | 1215 | Cytoplasmic | Putative CoA-substrate-specific enzyme activase                   |
| tr Q0STL0 Q0STL0_CLOPS | 1225 | Cytoplasmic | Amidohydrolase family protein                                     |
| tr Q0STK4 Q0STK4_CLOPS | 1231 | Cytoplasmic | Putative dipeptidase                                              |
| tr Q0STI9 Q0STI9_CLOPS | 1246 | Cytoplasmic | Uncharacterized protein                                           |
| tr Q0STI8 Q0STI8_CLOPS | 1247 | Cytoplasmic | Uncharacterized protein                                           |
| tr Q0STH0 Q0STH0_CLOPS | 1265 | Cytoplasmic | NADPH-dependent butanol dehydrogenase, Adh1                       |
| tr Q0STE7 Q0STE7_CLOPS | 1288 | Cytoplasmic | Tetratricopeptide repeat protein                                  |
| tr Q0STE3 Q0STE3_CLOPS | 1292 | cytoplasmic | Ribonuclease R, Rnr                                               |
| sp Q0STE0 ENO_CLOPS    | 1295 | Cytoplasmic | Enolase, Eno                                                      |
| sp Q0STD7 GPMI_CLOPS   | 1298 | Cytoplasmic | 2,3-bisphosphoglycerate-independent phosphoglycerate mutase, Gpml |
| sp Q0STD6 TPIS_CLOPS   | 1299 | Cytoplasmic | Triosephosphate isomerase, TpiA                                   |
| sp Q0STD5 PGK_CLOPS    | 1300 | Cytoplasmic | Phosphoglycerate kinase, Pgk                                      |
| tr Q0STD4 Q0STD4_CLOPS | 1301 | Cytoplasmic | Glyceraldehyde-3-phosphate dehydrogenase, type I, Gap             |
| tr Q0STC8 Q0STC8_CLOPS | 1307 | Cytoplasmic | DegV family protein                                               |
| tr Q0STB6 Q0STB6_CLOPS | 1321 | Cytoplasmic | Serine acetyltransferase, CysE                                    |
| tr Q0STA9 Q0STA9_CLOPS | 1328 | Cytoplasmic | Diacylglycerol kinase catalytic domain protein                    |
| tr Q0STA6 Q0STA6_CLOPS | 1331 | Cytoplasmic | Rubrerythrin                                                      |
| sp Q0STA4 Y1333_CLOPS  | 1333 | Cytoplasmic | UPF0229 protein                                                   |
| tr Q0STA3 Q0STA3_CLOPS | 1334 | Cytoplasmic | Non-specific serine/threonine protein kinase, PrkA                |
| sp Q0ST92 GAL1_CLOPS   | 1345 | Cytoplasmic | Galactokinase, GalK                                               |
| tr Q0ST87 Q0ST87_CLOPS | 1350 | Cytoplasmic | Fructose-1,6-bisphosphate aldolase, class II, Fba                 |
| sp Q0ST54 CLPX_CLOPS   | 1384 | Cytoplasmic | ATP-dependent Clp protease ATP-binding subunit ClpX               |
| sp Q0ST53 CLPP_CLOPS   | 1385 | Cytoplasmic | ATP-dependent Clp protease proteolytic subunit, ClpP              |
| sp Q0ST52 TIG_CLOPS    | 1386 | Cytoplasmic | Trigger factor, Tig                                               |
| sp Q0ST47 DEOD_CLOPS   | 1391 | cytoplasmic | Purine nucleoside phosphorylase DeoD-type, DeoD                   |
| tr Q0ST22 Q0ST22_CLOPS | 1416 | cytoplasmic | ClpB protein                                                      |
| tr Q0SSZ0 Q0SSZ0_CLOPS | 1448 | Cytoplasmic | Aminotransferase, class V                                         |
| tr Q0SSS9 Q0SSS9_CLOPS | 1510 | Cytoplasmic | Fructokinase                                                      |
| tr Q0SSR9 Q0SSR9_CLOPS | 1520 | Cytoplasmic | Uncharacterized protein                                           |
| tr Q0SSQ1 Q0SSQ1_CLOPS | 1539 | Cytoplasmic | Peptidyl-prolyl cis-trans isomerase, cyclophilin-type             |
| tr Q0SSM8 Q0SSM8_CLOPS | 1563 | Cytoplasmic | Uncharacterized protein                                           |
| tr Q0SSI4 Q0SSI4_CLOPS | 1607 | Cytoplasmic | V-type ATP synthase subunit D, AtpD                               |

|                        |      |             |                                                                                       |
|------------------------|------|-------------|---------------------------------------------------------------------------------------|
| sp Q0SSI3 VATB_CLOPS   | 1608 | Cytoplasmic | V-type ATP synthase beta chain, AtpB                                                  |
| sp Q0SSI2 VATA_CLOPS   | 1609 | Cytoplasmic | V-type ATP synthase alpha chain, AtpA                                                 |
| sp Q0SSH9 VATE_CLOPS   | 1612 | Cytoplasmic | V-type ATP synthase subunit E, AtpE                                                   |
| tr Q0SSG4 Q0SSG4_CLOPS | 1627 | Cytoplasmic | Conserved domain protein                                                              |
| tr Q0SSF9 Q0SSF9_CLOPS | 1633 | Cytoplasmic | Arginine--tRNA ligase, ArgS                                                           |
| tr Q0SSF5 Q0SSF5_CLOPS | 1637 | Cytoplasmic | PhoH family protein                                                                   |
| tr Q0SSF4 Q0SSF4_CLOPS | 1638 | Cytoplasmic | Putative DNA polymerase III, epsilon subunit                                          |
| tr Q0SSF1 Q0SSF1_CLOPS | 1641 | Cytoplasmic | Phosphocarrier, HPr family                                                            |
| tr Q0SSF0 Q0SSF0_CLOPS | 1642 | Cytoplasmic | Aspartate aminotransferase, AspB                                                      |
| sp Q0SSE8 RNY_CLOPS    | 1644 | Cytoplasmic | Ribonuclease Y, Rny                                                                   |
| sp Q0SSE7 RECA_CLOPS   | 1645 | Cytoplasmic | Protein RecA                                                                          |
| sp Q0SSE5 RIMO_CLOPS   | 1647 | Cytoplasmic | Ribosomal protein S12 methylthiotransferase RimO                                      |
| tr Q0SSE3 Q0SSE3_CLOPS | 1649 | Cytoplasmic | Putative endopeptidase, ClpP                                                          |
| sp Q0SSE0 PNP_CLOPS    | 1652 | Cytoplasmic | Polyribonucleotide nucleotidyltransferase, Pnp                                        |
| sp Q0SSD9 RS15_CLOPS   | 1653 | Cytoplasmic | 30S ribosomal protein S15, RpsO                                                       |
| tr Q0SSD1 Q0SSD1_CLOPS | 1661 | Cytoplasmic | N utilization substance protein A, NusA                                               |
| tr Q0SSC8 Q0SSC8_CLOPS | 1664 | Cytoplasmic | 4-hydroxy-3-methylbut-2-en-1-yl diphosphate synthase, IspG                            |
| sp Q0SSC2 PYRH_CLOPS   | 1670 | cytoplasmic | Uridylate kinase, PyrH                                                                |
| sp Q0SSC1 EFTS_CLOPS   | 1671 | Cytoplasmic | Elongation factor Ts, Tsf                                                             |
| sp Q0SSC0 RS2_CLOPS    | 1672 | Cytoplasmic | 30S ribosomal protein S2, RpsB                                                        |
| tr Q0SSB2 Q0SSB2_CLOPS | 1680 | Cytoplasmic | 50S ribosomal protein L19, RplS                                                       |
| sp Q0SSA8 RS16_CLOPS   | 1684 | Cytoplasmic | 30S ribosomal protein S16, RpsP                                                       |
| tr Q0SS97 Q0SS97_CLOPS | 1695 | Cytoplasmic | Acetate kinase, AckA_2                                                                |
| tr Q0SS89 Q0SS89_CLOPS | 1703 | Cytoplasmic | DAK2 domain protein                                                                   |
| sp Q0SS87 RL28_CLOPS   | 1705 | Cytoplasmic | 50S ribosomal protein L28, RpmB                                                       |
| tr Q0SS75 Q0SS75_CLOPS | 1717 | Cytoplasmic | Phosphopantothenoylcysteine decarboxylase/phosphopantothenate--cysteine ligase, CoaBC |
| tr Q0SS68 Q0SS68_CLOPS | 1724 | Cytoplasmic | Stage IV sporulation protein A, SpoIVA                                                |
| tr Q0SS60 Q0SS60_CLOPS | 1732 | Cytoplasmic | RNA polymerase sigma factor, SigG                                                     |
| tr Q0SS51 Q0SS51_CLOPS | 1741 | Cytoplasmic | Peptidase, U32 family                                                                 |
| tr Q0SS47 Q0SS47_CLOPS | 1745 | Cytoplasmic | RNA-metabolizing metallo-beta-lactamase family protein                                |
| tr Q0SS37 Q0SS37_CLOPS | 1755 | Cytoplasmic | Cysteine desulfurase, IscS                                                            |
| sp Q0SR9 EFP_CLOPS     | 1803 | Cytoplasmic | Elongation factor P, Efp                                                              |
| tr Q0SRV8 Q0SRV8_CLOPS | 1835 | Cytoplasmic | GTP-binding protein YchF                                                              |
| tr Q0SRV2 Q0SRV2_CLOPS | 1841 | Cytoplasmic | Phosphoglucomutase/phosphomanomutase family protein                                   |
| sp Q0SRT7 RL20_CLOPS   | 1856 | Cytoplasmic | 50S ribosomal protein L20, RplT                                                       |
| sp Q0SRT6 RL35_CLOPS   | 1857 | Cytoplasmic | 50S ribosomal protein L35, RplI                                                       |



|                        |      |             |                                                                        |
|------------------------|------|-------------|------------------------------------------------------------------------|
| tr Q0SRS6 Q0SRS6_CLOPS | 1871 | cytoplasmic | Aspartate-semialdehyde dehydrogenase, Asd                              |
| tr Q0SRS2 Q0SRS2_CLOPS | 1875 | cytoplasmic | Putative cob(I)alamin adenosyltransferase                              |
| sp Q0SRS1 DAPH_CLOPS   | 1876 | Cytoplasmic | 2,3,4,5-tetrahydropyridine-2,6-dicarboxylate N-acetyltransferase, DapH |
| sp Q0SRP8 SYD_CLOPS    | 1899 | cytoplasmic | Aspartate--tRNA ligase, AspS                                           |
| tr Q0SRM0 Q0SRM0_CLOPS | 1927 | Cytoplasmic | GTPase HflX                                                            |
| tr Q0SRI8 Q0SRI8_CLOPS | 1960 | Cytoplasmic | Transglycosylase, SLT family                                           |
| tr Q0SRI3 Q0SRI3_CLOPS | 1965 | Cytoplasmic | Aminopeptidase                                                         |
| tr Q0SRH3 Q0SRH3_CLOPS | 1975 | Cytoplasmic | RNA polymerase sigma factor, RpoD                                      |
| tr Q0SRG5 Q0SRG5_CLOPS | 1983 | Cytoplasmic | Pyruvate, phosphate dikinase, PpdK                                     |
| sp Q0SRF3 RS21_CLOPS   | 1995 | Cytoplasmic | 30S ribosomal protein S21, RpsU                                        |
| tr Q0SRE4 Q0SRE4_CLOPS | 2004 | Cytoplasmic | Chaperone protein DnaJ                                                 |
| sp Q0SRE3 DNAK_CLOPS   | 2005 | Cytoplasmic | Chaperone protein DnaK                                                 |
| sp Q0SRD5 GPR_CLOPS    | 2013 | Cytoplasmic | Germination protease, Gpr                                              |
| tr Q0SRD0 Q0SRD0_CLOPS | 2018 | Cytoplasmic | Stage V sporulation protein AD, SpoVAD                                 |
| sp Q0SRC7 SP2AB_CLOPS  | 2021 | Cytoplasmic | Anti-sigma F factor, SpoIIAB                                           |
| tr Q0SRC6 Q0SRC6_CLOPS | 2022 | Cytoplasmic | Anti-sigma F factor antagonist, SpoIIAA                                |
| sp Q0SRC4 DEOC_CLOPS   | 2024 | Cytoplasmic | Deoxyribose-phosphate aldolase, DeoC                                   |
| tr Q0SRC1 Q0SRC1_CLOPS | 2027 | Cytoplasmic | Putative manganese-dependent inorganic pyrophosphatase                 |
| tr Q0SRB9 Q0SRB9_CLOPS | 2029 | Cytoplasmic | Glutamate decarboxylase                                                |
| tr Q0SR89 Q0SR89_CLOPS | 2059 | cytoplasmic | FemAB family protein                                                   |
| tr Q0SR77 Q0SR77_CLOPS | 2071 | Cytoplasmic | CspA family protein                                                    |
| sp Q0SR54 OBG_CLOPS    | 2094 | Cytoplasmic | GTPase obg                                                             |
| sp Q0SR51 RL21_CLOPS   | 2097 | Cytoplasmic | 50S ribosomal protein L21, RplU                                        |
| tr Q0SR48 Q0SR48_CLOPS | 2100 | Cytoplasmic | Radical SAM domain protein                                             |
| tr Q0SR38 Q0SR38_CLOPS | 2110 | Cytoplasmic | Rod shape-determining protein MreB                                     |
| tr Q0SR33 Q0SR33_CLOPS | 2115 | Cytoplasmic | Aminoacyl-histidine dipeptidase, PepD_1                                |
| tr Q0SR32 Q0SR32_CLOPS | 2116 | Cytoplasmic | Pyruvate kinase, Pyk                                                   |
| tr Q0SR19 Q0SR19_CLOPS | 2131 | Cytoplasmic | CBS domain protein                                                     |
| sp Q0SR11 SECA_CLOPS   | 2139 | Cytoplasmic | Protein translocase subunit SecA                                       |
| sp Q0SR05 METK_CLOPS   | 2145 | Cytoplasmic | S-adenosylmethionine synthase, MetK                                    |
| sp Q0SQZ4 ATPG_CLOPS   | 2163 | Cytoplasmic | ATP synthase gamma chain, AtpG                                         |
| sp Q0SQZ3 ATPA_CLOPS   | 2164 | Cytoplasmic | ATP synthase subunit alpha, AtpA                                       |
| tr Q0SQY7 Q0SQY7_CLOPS | 2170 | Cytoplasmic | Acetyl-CoA acetyltransferase                                           |
| tr Q0SQY6 Q0SQY6_CLOPS | 2171 | Cytoplasmic | UDP-N-acetylglucosamine 2-epimerase, MnaA                              |
| sp Q0SQY5 UPP_CLOPS    | 2172 | Cytoplasmic | Uracil phosphoribosyltransferase, Upp                                  |
| sp Q0SQX5 PYRG_CLOPS   | 2182 | Cytoplasmic | CTP synthase, PyrG                                                     |

|                        |      |             |                                                                         |
|------------------------|------|-------------|-------------------------------------------------------------------------|
| tr Q0SQW8 Q0SQW8_CLOPS | 2189 | cytoplasmic | LysM domain protein                                                     |
| sp Q0SQS9 G6PI_CLOPS   | 2252 | cytoplasmic | Glucose-6-phosphate isomerase, Pgi                                      |
| tr C6UAS4 C6UAS4_CLOPS | 2275 | Cytoplasmic | 60 kDa chaperonin, GroEL                                                |
| tr Q0SQP9 Q0SQP9_CLOPS | 2283 | Cytoplasmic | 3-hydroxybutyryl-CoA dehydrogenase, Hbd                                 |
| tr Q0SQP8 Q0SQP8_CLOPS | 2284 | Cytoplasmic | Electron transfer flavoprotein, alpha subunit/FixB family protein, FixB |
| tr Q0SQP6 Q0SQP6_CLOPS | 2286 | Cytoplasmic | Butyryl-CoA dehydrogenase, Bcd                                          |
| tr Q0SQP5 Q0SQP5_CLOPS | 2287 | Cytoplasmic | 3-hydroxybutyryl-CoA dehydratase, Crt                                   |
| sp Q0SQP4 REX_CLOPS    | 2288 | Cytoplasmic | Redox-sensing transcriptional repressor rex                             |
| tr Q0SQN8 Q0SQN8_CLOPS | 2294 | Cytoplasmic | Mannose-1-phosphate guanylyltransferase                                 |
| sp Q0SQM4 SYT_CLOPS    | 2317 | Cytoplasmic | Threonine--tRNA ligase, ThrS                                            |
| tr Q0SQL9 Q0SQL9_CLOPS | 2322 | Cytoplasmic | Glutamine--fructose-6-phosphate aminotransferase [isomerizing], GlmS    |
| tr Q0SQL8 Q0SQL8_CLOPS | 2323 | Cytoplasmic | Rubrerythrin family protein                                             |
| sp Q0SQL7 GLMM_CLOPS   | 2324 | Cytoplasmic | Phosphoglucosamine mutase, GlmM                                         |
| sp Q0SQK0 BUK_CLOPS    | 2342 | cytoplasmic | Probable butyrate kinase buk                                            |
| tr Q0SQJ9 Q0SQJ9_CLOPS | 2343 | cytoplasmic | Phosphate butyryltransferase ptb                                        |
| tr Q0SQJ1 Q0SQJ1_CLOPS | 2351 | cytoplasmic | Isoaspartyl dipeptidase, ladA                                           |
| tr Q0SQJ0 Q0SQJ0_CLOPS | 2352 | Cytoplasmic | Phosphoenolpyruvate-protein phosphotransferase, PtsI                    |
| sp Q0SQI8 RS4B_CLOPS   | 2354 | Cytoplasmic | 30S ribosomal protein S4 B, RpsD2                                       |
| sp Q0SQH9 RS9_CLOPS    | 2363 | Cytoplasmic | 30S ribosomal protein S9, RpsI                                          |
| sp Q0SQH8 RL13_CLOPS   | 2364 | Cytoplasmic | 50S ribosomal protein L13, RplM                                         |
| sp Q0SQH4 RL17_CLOPS   | 2369 | Cytoplasmic | 50S ribosomal protein L17, RplQ                                         |
| sp Q0SQH3 RPOA_CLOPS   | 2370 | Cytoplasmic | DNA-directed RNA polymerase subunit alpha, RpoA                         |
| sp Q0SQH2 RS4A_CLOPS   | 2371 | Cytoplasmic | 30S ribosomal protein S4 AR, psD1                                       |
| sp Q0SQH1 RS11_CLOPS   | 2372 | Cytoplasmic | 30S ribosomal protein S11, RpsK                                         |
| sp Q0SQH0 RS13_CLOPS   | 2373 | Cytoplasmic | 30S ribosomal protein S13, RpsM                                         |
| sp Q0SQG1 RS5_CLOPS    | 2382 | Cytoplasmic | 30S ribosomal protein S5, RpsE                                          |
| sp Q0SQG0 RL18_CLOPS   | 2383 | Cytoplasmic | 50S ribosomal protein L18, RplR                                         |
| sp Q0SQF9 RL6_CLOPS    | 2384 | Cytoplasmic | 50S ribosomal protein L6, RplF                                          |
| sp Q0SQF8 RS8_CLOPS    | 2385 | Cytoplasmic | 30S ribosomal protein S8, RpsH                                          |
| sp Q0SQF6 RL5_CLOPS    | 2387 | Cytoplasmic | 50S ribosomal protein L5, RplE                                          |
| sp Q0SQF4 RL14_CLOPS   | 2389 | Cytoplasmic | 50S ribosomal protein L14, RplN                                         |
| sp Q0SQF3 RS17_CLOPS   | 2390 | Cytoplasmic | 30S ribosomal protein S17, RpsQ                                         |
| sp Q0SQF1 RL16_CLOPS   | 2392 | Cytoplasmic | 50S ribosomal protein L16, RplP                                         |
| sp Q0SQF0 RS3_CLOPS    | 2393 | Cytoplasmic | 30S ribosomal protein S3, RpsC                                          |
| sp Q0SQE9 RL22_CLOPS   | 2394 | Cytoplasmic | 50S ribosomal protein L22, RplV                                         |
| sp Q0SQE8 RS19_CLOPS   | 2395 | Cytoplasmic | 30S ribosomal protein S19, RpsS                                         |
| sp Q0SQE6 RL23_CLOPS   | 2397 | Cytoplasmic | 50S ribosomal protein L23, RplW                                         |

|                        |      |                      |                                                                |
|------------------------|------|----------------------|----------------------------------------------------------------|
| sp Q0SQE4 RL3_CLOPS    | 2399 | cytoplasmic          | 50S ribosomal protein L3, RplC                                 |
| sp Q0SQE3 RS10_CLOPS   | 2400 | Cytoplasmic          | 30S ribosomal protein S10, RpsJ                                |
| sp Q0SQC8 EFTU_CLOPS   | 2402 | cytoplasmic          | Elongation factor Tu, Tuf1                                     |
| sp Q0SQE1 EFG_CLOPS    | 2403 | Cytoplasmic          | Elongation factor G, FusA                                      |
| sp Q0SQE0 RS7_CLOPS    | 2404 | Cytoplasmic          | 30S ribosomal protein S7, RpsG                                 |
| sp Q0SQD9 RS12_CLOPS   | 2405 | Cytoplasmic          | 30S ribosomal protein S12, RpsL                                |
| sp Q0SQD7 RPOC_CLOPS   | 2407 | Cytoplasmic          | DNA-directed RNA polymerase subunit beta, RpoC                 |
| sp Q0SQD6 RPOB_CLOPS   | 2408 | Cytoplasmic          | DNA-directed RNA polymerase subunit beta, RpoB                 |
| sp Q0SQD5 RL7_CLOPS    | 2409 | Cytoplasmic          | 50S ribosomal protein L7/L12, RplL                             |
| tr Q0SQD4 Q0SQD4_CLOPS | 2410 | Cytoplasmic          | 50S ribosomal protein L10, RplJ                                |
| sp Q0SQD3 RL1_CLOPS    | 2411 | Cytoplasmic          | 50S ribosomal protein L1, RplA                                 |
| sp Q0SQD2 RL11_CLOPS   | 2412 | Cytoplasmic          | 50S ribosomal protein L11, RplK                                |
| tr Q0SQC4 Q0SQC4_CLOPS | 2421 | Cytoplasmic          | Thymidylate synthase ThyX                                      |
| sp Q0SQC1 SYC_CLOPS    | 2424 | Cytoplasmic          | Cysteine--tRNA ligase, CysS                                    |
| sp Q0SQC0 SYP_CLOPS    | 2425 | Cytoplasmic          | Proline--tRNA ligase, ProS                                     |
| tr Q0SQB7 Q0SQB7_CLOPS | 2428 | Cytoplasmic          | Uncharacterized protein                                        |
| tr Q0SQB1 Q0SQB1_CLOPS | 2434 | Cytoplasmic          | Glyceraldehyde-3-phosphate dehydrogenase, NADP-dependent, GapN |
| tr Q0SQ95 Q0SQ95_CLOPS | 2450 | Cytoplasmic          | Amidohydrolase homolog                                         |
| tr Q0SQ87 Q0SQ87_CLOPS | 2465 | Cytoplasmic          | Glycine--tRNA ligase, GlyS                                     |
| sp Q0SQ86 SYK_CLOPS    | 2467 | Cytoplasmic          | Lysine--tRNA ligase, LysS                                      |
| tr Q0SQ69 Q0SQ69_CLOPS | 2491 | Cytoplasmic          | Stage V sprulation protein T, SpoVT                            |
| tr Q0SQ62 Q0SQ62_CLOPS | 2498 | Cytoplasmic          | Ribose-phosphate pyrophosphokinase, PrsA                       |
| sp Q0SQ51 SYN_CLOPS    | 2509 | cytoplasmic          | Asparagine--tRNA ligase, AsnS                                  |
| sp Q0SQ50 AMPA_CLOPS   | 2510 | cytoplasmic          | Probable cytosol aminopeptidase, PepA                          |
| tr Q0SQ35 Q0SQ35_CLOPS | 2525 | Cytoplasmic          | Uncharacterized protein                                        |
| tr Q0SQ27 Q0SQ27_CLOPS | 2533 | Cytoplasmic          | Methionine--tRNA ligase, MetG_2                                |
| tr Q0SQ20 Q0SQ20_CLOPS | 2540 | Cytoplasmic          | Aldehyde-alcohol dehydrogenase, AdhE                           |
| tr Q0SQ12 Q0SQ12_CLOPS | 2548 | Cytoplasmic          | Putative catabolite control protein A                          |
| sp Q0SQ01 GLPK_CLOPS   | 2559 | Cytoplasmic          | Glycerol kinase, GlpK                                          |
| tr Q0SPZ6 Q0SPZ6_CLOPS | 2564 | Cytoplasmic          | Putative lipoprotein                                           |
| tr Q0SPZ0 Q0SPZ0_CLOPS | 2570 | Cytoplasmic          | Peptidyl-prolyl cis-trans isomerase                            |
| sp Q0SPX8 PROA_CLOPS   | 2582 | Cytoplasmic          | Gamma-glutamyl phosphate reductase, ProA                       |
| tr Q0SPX6 Q0SPX6_CLOPS | 2584 | Cytoplasmic          | Oxidoreductase, short chain dehydrogenase/reductase family     |
| tr Q0SPS1 Q0SPS1_CLOPS | 2651 | Cytoplasmic          | DHH family protein                                             |
| sp Q0SPR8 RS18_CLOPS   | 2654 | Cytoplasmic          | 30S ribosomal protein S18, RpsR                                |
| sp Q0SPP8 RL34_CLOPS   | 2674 | Cytoplasmic          | 50S ribosomal protein L34, RpmH                                |
| sp Q0SWT6 PSD_CLOPS    | 0033 | Cytoplasmic Membrane | Phosphatidylserine decarboxylase proenzyme psd                 |
| tr Q0SWV4 Q0SWV4_CLOPS | 0036 | Cytoplasmic Membrane | Putative transporter                                           |

|                        |      |                      |                                                                |
|------------------------|------|----------------------|----------------------------------------------------------------|
| tr Q0SWK4 Q0SWK4_CLOPS | 0159 | Cytoplasmic Membrane | Arginine/ornithine antiporter, ArcD                            |
| tr Q0SWI7 Q0SWI7_CLOPS | 0176 | Cytoplasmic Membrane | Sodium:solute transporter                                      |
| tr Q0SWD6 Q0SWD6_CLOPS | 0230 | Cytoplasmic Membrane | Uncharacterized protein                                        |
| tr Q0SWC5 Q0SWC5_CLOPS | 0241 | Cytoplasmic Membrane | Uncharacterized protein                                        |
| tr Q0SWB6 Q0SWB6_CLOPS | 0253 | Cytoplasmic Membrane | PPIC-type PPIASE domain protein                                |
| tr Q0SW99 Q0SW99_CLOPS | 0271 | Cytoplasmic Membrane | Putative transcriptional regulator                             |
| tr Q0SW80 Q0SW80_CLOPS | 0291 | Cytoplasmic Membrane | Putative cell division ATP-binding protein FtsE                |
| tr Q0SW79 Q0SW79_CLOPS | 0292 | Cytoplasmic Membrane | Cell division protein FtsX                                     |
| tr Q0SW78 Q0SW78_CLOPS | 0293 | Cytoplasmic Membrane | Carboxyl-terminal protease                                     |
| tr Q0SW59 Q0SW59_CLOPS | 0312 | Cytoplasmic Membrane | Uncharacterized protein                                        |
| tr Q0SW39 Q0SW39_CLOPS | 0332 | Cytoplasmic Membrane | Putative penicillin-binding protein                            |
| tr Q0SW08 Q0SW08_CLOPS | 0363 | Cytoplasmic Membrane | ABC transporter, permease/ATP-binding protein                  |
| tr Q0SW07 Q0SW07_CLOPS | 0364 | Cytoplasmic Membrane | ABC transporter, permease/ATP-binding protein                  |
| tr Q0SW05 Q0SW05_CLOPS | 0366 | Cytoplasmic Membrane | Toxin secretion/phage lysis holin                              |
| tr Q0SVY4 Q0SVY4_CLOPS | 0387 | Cytoplasmic Membrane | Uncharacterized protein                                        |
| tr Q0SVX2 Q0SVX2_CLOPS | 0399 | Cytoplasmic Membrane | PTS system, mannose/fructose/sorbose family, IID component     |
| tr Q0SVU0 Q0SVU0_CLOPS | 0431 | Cytoplasmic Membrane | Uncharacterized protein                                        |
| tr Q0SVP6 Q0SVP6_CLOPS | 0476 | Cytoplasmic Membrane | ABC transporter, substrate-binding protein                     |
| tr Q0SVP5 Q0SVP5_CLOPS | 0477 | Cytoplasmic Membrane | ABC transporter, permease protein                              |
| tr Q0SVP4 Q0SVP4_CLOPS | 0478 | Cytoplasmic Membrane | ABC transporter, permease protein                              |
| tr Q0SVJ4 Q0SVJ4_CLOPS | 0528 | Cytoplasmic Membrane | Stage V sporulation protein D                                  |
| tr Q0SVI2 Q0SVI2_CLOPS | 0540 | Cytoplasmic Membrane | ABC transporter, substrate-binding protei                      |
| tr Q0SVF9 Q0SVF9_CLOPS | 0564 | Cytoplasmic Membrane | Signal peptidase I                                             |
| tr Q0SVF8 Q0SVF8_CLOPS | 0565 | Cytoplasmic Membrane | ATP-dependent zinc metalloprotease FtsH                        |
| tr Q0SVC5 Q0SVC5_CLOPS | 0598 | Cytoplasmic Membrane | Cell envelope-related transcriptional attenuator domain family |
| tr Q0SVC0 Q0SVC0_CLOPS | 0603 | Cytoplasmic Membrane | Phosphate ABC transporter, phosphate-binding protein, PstS_1   |
| tr Q0SVA8 Q0SVA8_CLOPS | 0615 | Cytoplasmic Membrane | Spore germination protein, GerABKA family                      |
| tr Q0SV26 Q0SV26_CLOPS | 0698 | Cytoplasmic Membrane | ABC transporter, ATP-binding protein                           |
| tr Q0SUZ4 Q0SUZ4_CLOPS | 0730 | Cytoplasmic Membrane | Uncharacterized protein                                        |
| tr Q0SUS7 Q0SUS7_CLOPS | 0805 | Cytoplasmic Membrane | PTS system, mannose/fructose/sorbose family, IIC component     |
| tr Q0SUS6 Q0SUS6_CLOPS | 0806 | Cytoplasmic Membrane | PTS system, mannose/fructose/sorbose family, IID component     |
| tr Q0SUR3 Q0SUR3_CLOPS | 0819 | Cytoplasmic Membrane | Antibiotic ABC transporter, permease protein                   |

|                        |      |                      |                                                               |
|------------------------|------|----------------------|---------------------------------------------------------------|
| tr Q0SUM3 Q0SUM3_CLOPS | 0859 | Cytoplasmic Membrane | Uncharacterized protein                                       |
| tr Q0SUH9 Q0SUH9_CLOPS | 0904 | Cytoplasmic Membrane | Substrate-binding protein MsmE                                |
| tr Q0SUH6 Q0SUH6_CLOPS | 0907 | Cytoplasmic Membrane | Sugar ABC transporter, ATP-binding protein , MsmK             |
| tr Q0SUE8 Q0SUE8_CLOPS | 0935 | Cytoplasmic Membrane | PTS system, N-acetylglucosamine-specific IIBC component, NagE |
| tr Q0SUA1 Q0SUA1_CLOPS | 0983 | Cytoplasmic Membrane | Cation efflux family protein                                  |
| tr Q0SU83 Q0SU83_CLOPS | 1001 | Cytoplasmic Membrane | Glycerol uptake facilitator protein, GlpE                     |
| tr Q0SU63 Q0SU63_CLOPS | 1021 | Cytoplasmic Membrane | ABC transporter, ATP-binding protein                          |
| tr Q0SU50 Q0SU50_CLOPS | 1034 | Cytoplasmic Membrane | Amino acid permease family protein                            |
| tr Q0SU32 Q0SU32_CLOPS | 1053 | Cytoplasmic Membrane | GerA spore germination protein                                |
| tr Q0SU31 Q0SU31_CLOPS | 1054 | Cytoplasmic Membrane | C4-dicarboxylate anaerobic carrier family protein             |
| tr Q0STX0 Q0STX0_CLOPS | 1115 | Cytoplasmic Membrane | Iron compound ABC transporter, iron-binding protein           |
| tr Q0STU6 Q0STU6_CLOPS | 1139 | Cytoplasmic Membrane | 3-oxoacyl-[acyl-carrier-protein] synthase 2, FabF             |
| tr Q0STF9 Q0STF9_CLOPS | 1276 | Cytoplasmic Membrane | Oligopeptide transporter, OPT family                          |
| tr Q0STA8 Q0STA8_CLOPS | 1329 | Cytoplasmic Membrane | CDP-diacylglycerol--serine O-phosphatidyltransferase, PssA    |
| tr Q0ST94 Q0ST94_CLOPS | 1343 | Cytoplasmic Membrane | Galactoside ABC transporter, permease protein, MglC           |
| tr Q0ST89 Q0ST89_CLOPS | 1348 | Cytoplasmic Membrane | Uncharacterized protein                                       |
| tr Q0SSS6 Q0SSS6_CLOPS | 1513 | Cytoplasmic Membrane | PTS system, sucrose-specific IIBC component                   |
| tr Q0SSP8 Q0SSP8_CLOPS | 1542 | Cytoplasmic Membrane | Phage shock protein A, PspA                                   |
| tr Q0SSP0 Q0SSP0_CLOPS | 1550 | Cytoplasmic Membrane | ABC transporter, permease protein                             |
| tr Q0SSJ7 Q0SSJ7_CLOPS | 1594 | Cytoplasmic Membrane | Putative lipoprotein                                          |
| tr Q0SSH8 Q0SSH8_CLOPS | 1613 | Cytoplasmic Membrane | V-type ATPase, K subunit                                      |
| tr Q0SSH7 Q0SSH7_CLOPS | 1614 | Cytoplasmic Membrane | V-type ATPase, I subunit                                      |
| tr Q0SSG1 Q0SSG1_CLOPS | 1631 | Cytoplasmic Membrane | Ferrous iron transport protein B, FeoB_2                      |
| tr Q0SSC7 Q0SSC7_CLOPS | 1665 | Cytoplasmic Membrane | RIP metalloprotease RseP                                      |
| tr Q0SSA5 Q0SSA5_CLOPS | 1687 | Cytoplasmic Membrane | Signal recognition particle receptor FtsY                     |
| tr Q0SS83 Q0SS83_CLOPS | 1709 | Cytoplasmic Membrane | Serine/threonine protein kinase BH2504                        |
| tr Q0SS79 Q0SS79_CLOPS | 1713 | Cytoplasmic Membrane | Putative neutral zinc metallopeptidase                        |
| sp Q0SS66 DER_CLOPS    | 1726 | Cytoplasmic Membrane | GTPase Der                                                    |
| tr Q0SS49 Q0SS49_CLOPS | 1743 | Cytoplasmic Membrane | Uncharacterized protein                                       |
| tr Q0SRW6 Q0SRW6_CLOPS | 1826 | Cytoplasmic Membrane | Cell division protein FtsQ                                    |
| tr Q0SRP0 Q0SRP0_CLOPS | 1907 | Cytoplasmic Membrane | Protein-export membrane protein SecF                          |
| tr Q0SRN9 Q0SRN9_CLOPS | 1908 | Cytoplasmic Membrane | Protein translocase subunit SecD                              |
| tr Q0SRN6 Q0SRN6_CLOPS | 1911 | Cytoplasmic Membrane | Preprotein translocase, YajC                                  |

|                        |      |                      |                                                              |
|------------------------|------|----------------------|--------------------------------------------------------------|
|                        |      |                      | subunit, YajC_2                                              |
| sp Q0SRL7 PBPA_CLOPS   | 1930 | Cytoplasmic Membrane | Penicillin-binding protein 1A, PbpA                          |
| tr Q0SRL1 Q0SRL1_CLOPS | 1936 | Cytoplasmic Membrane | Spermidine/putrescine ABC transporter, permease protein PotB |
| tr Q0SRK4 Q0SRK4_CLOPS | 1943 | Cytoplasmic Membrane | D-alanyl-D-alanine carboxypeptidase family protein           |
| tr Q0SRG7 Q0SRG7_CLOPS | 1981 | Cytoplasmic Membrane | Putative permease                                            |
| tr Q0SRD1 Q0SRD1_CLOPS | 2017 | Cytoplasmic Membrane | Stage V sporulation protein AE, SpoVAE                       |
| tr Q0SRC9 Q0SRC9_CLOPS | 2019 | Cytoplasmic Membrane | Stage V sporulation protein AC, SpoVAC                       |
| tr Q0SRC2 Q0SRC2_CLOPS | 2026 | Cytoplasmic Membrane | Cation-transporting ATPase, P-type                           |
| sp Q0SRB4 MURG_CLOPS   | 2034 | Cytoplasmic Membrane | MurG transferasetransferase                                  |
| tr Q0SR78 Q0SR78_CLOPS | 2070 | Cytoplasmic Membrane | CspC family protein                                          |
| tr Q0SR70 Q0SR70_CLOPS | 2078 | Cytoplasmic Membrane | Transmembrane protein Vexp3                                  |
| tr Q0SR43 Q0SR43_CLOPS | 2105 | Cytoplasmic Membrane | Site-determining protein, MinD                               |
| tr Q0SR24 Q0SR24_CLOPS | 2124 | Cytoplasmic Membrane | PTS system, glucose-specific IIBC component, PtsG            |
| tr Q0SR23 Q0SR23_CLOPS | 2125 | Cytoplasmic Membrane | ABC transporter, substrate-binding protein                   |
| sp Q0SQZ5 ATPB_CLOPS   | 2162 | Cytoplasmic Membrane | ATP synthase subunit beta, AtpD                              |
| sp Q0SQZ1 ATPF_CLOPS   | 2166 | Cytoplasmic Membrane | ATP synthase subunit b, AtpF                                 |
| tr Q0SQX6 Q0SQX6_CLOPS | 2181 | Cytoplasmic Membrane | Transcription termination factor Rho                         |
| tr Q0SQW9 Q0SQW9_CLOPS | 2188 | Cytoplasmic Membrane | Cyanophycinase, CphB                                         |
| tr Q0SQT7 Q0SQT7_CLOPS | 2244 | Cytoplasmic Membrane | Uncharacterized protein                                      |
| tr Q0SQS7 Q0SQS7_CLOPS | 2254 | Cytoplasmic Membrane | Oligopeptide/dipeptide ABC transporter, ATP-binding protein  |
| tr Q0SQS6 Q0SQS6_CLOPS | 2255 | Cytoplasmic Membrane | Oligopeptide/dipeptide ABC transporter, ATP-binding protein  |
| tr Q0SQS4 Q0SQS4_CLOPS | 2257 | Cytoplasmic Membrane | Oligopeptide/dipeptide ABC transporter, permease protein     |
| tr Q0SQS2 Q0SQS2_CLOPS | 2259 | Cytoplasmic Membrane | Major facilitator family transporter                         |
| tr Q0SQP3 Q0SQP3_CLOPS | 2289 | Cytoplasmic Membrane | Zinc-transporting atpase                                     |
| tr Q0SQK2 Q0SQK2_CLOPS | 2340 | Cytoplasmic Membrane | ABC transporter, ATP-binding protein                         |
| tr Q0SQG4 Q0SQG4_CLOPS | 2379 | Cytoplasmic Membrane | Protein translocase subunit SecY                             |
| tr Q0SQB8 Q0SQB8_CLOPS | 2427 | Cytoplasmic Membrane | PIN/TRAM domain protein                                      |
| tr Q0SQ93 Q0SQ93_CLOPS | 2452 | Cytoplasmic Membrane | Putative cation transporter2 PE=4 SV=1                       |
| tr Q0SQ81 Q0SQ81_CLOPS | 2472 | Cytoplasmic Membrane | ATP-dependent zinc metalloprotease FtsH                      |
| sp Q0SQ68 PRSA_CLOPS   | 2492 | Cytoplasmic Membrane | Foldase protein PrsA                                         |
| tr Q0SQ55 Q0SQ55_CLOPS | 2505 | Cytoplasmic Membrane | Nucleoside transporter, NupC family                          |
| tr Q0SQ36 Q0SQ36_CLOPS | 2524 | Cytoplasmic Membrane | Uncharacterized protein                                      |
| tr Q0SPW7 Q0SPW7_CLOPS | 2593 | Cytoplasmic Membrane | Putative phage infection protein                             |
| tr Q0SPW6 Q0SPW6_CLOPS | 2594 | Cytoplasmic Membrane | Putative phage infection protein                             |
| tr Q0SPQ1 Q0SPQ1_CLOPS | 2671 | Cytoplasmic Membrane | Membrane protein OxaA                                        |

|                        |      |               |                                                                   |
|------------------------|------|---------------|-------------------------------------------------------------------|
| tr Q0STI4 Q0STI4_CLOPS | 1251 | extracellular | Superoxide dismutase, SodF                                        |
| tr Q0STC4 Q0STC4_CLOPS | 1311 | extracellular | Glycosyl hydrolase, family 25                                     |
| tr Q0SPZ3 Q0SPZ3_CLOPS | 2567 | Extracellular | Protease CspB                                                     |
| tr Q0SWP9 Q0SWP9_CLOPS | 0114 | unknown       | Uncharacterized protein                                           |
| sp Q0SWN5 CINA_CLOPS   | 0128 | unknown       | Putative competence-damage inducible protein, CinA1               |
| tr Q0SWM3 Q0SWM3_CLOPS | 0140 | unknown       | Nad-dependent malic enzyme                                        |
| tr Q0SWH6 Q0SWH6_CLOPS | 0188 | unknown       | 5'-nucleotidase, lipoprotein e(P4) family                         |
| tr Q0SW97 Q0SW97_CLOPS | 0273 | unknown       | UDP-glucose 4-epimerase, GalE_1                                   |
| tr Q0SW33 Q0SW33_CLOPS | 0338 | unknown       | Putative lioprotein                                               |
| tr Q0SVR9 Q0SVR9_CLOPS | 0452 | unknown       | Capsule chain length determinant protein                          |
| tr Q0SVQ8 Q0SVQ8_CLOPS | 0463 | unknown       | Uncharacterized protein                                           |
| tr Q0SVP3 Q0SVP3_CLOPS | 0479 | unknown       | Sortase family protein                                            |
| tr Q0SVM0 Q0SVM0_CLOPS | 0502 | unknown       | Putative lipoprotein                                              |
| tr Q0SVF6 Q0SVF6_CLOPS | 0567 | unknown       | Amino acid ABC transporter, amino acid-binding protein            |
| tr Q0SUS5 Q0SUS5_CLOPS | 0807 | unknown       | Uncharacterized protein                                           |
| tr Q0SU89 Q0SU89_CLOPS | 0995 | unknown       | Conserved domain protein                                          |
| tr Q0STY5 Q0STY5_CLOPS | 1100 | unknown       | Putative lipoprotein                                              |
| tr Q0STM6 Q0STM6_CLOPS | 1209 | unknown       | VanW-related protein                                              |
| tr Q0STC9 Q0STC9_CLOPS | 1306 | unknown       | Lipoprotein, BMP family                                           |
| tr Q0STC5 Q0STC5_CLOPS | 1310 | unknown       | VanW-like family protein                                          |
| tr Q0STB8 Q0STB8_CLOPS | 1319 | unknown       | 1-acyl-sn-glycerol-3-phosphate acyltransferase family protein     |
| tr Q0ST96 Q0ST96_CLOPS | 1341 | unknown       | Putative galactoside ABC transporter, galactoside-binding protein |
| tr Q0ST88 Q0ST88_CLOPS | 1349 | unknown       | Uncharacterized protein                                           |
| tr Q0ST82 Q0ST82_CLOPS | 1355 | unknown       | Uncharacterized protein                                           |
| tr Q0ST46 Q0ST46_CLOPS | 1392 | unknown       | Uncharacterized protein                                           |
| tr Q0SSX2 Q0SSX2_CLOPS | 1466 | unknown       | Uncharacterized protein                                           |
| tr Q0SSV8 Q0SSV8_CLOPS | 1480 | unknown       | Metallo-beta-lactamase family protein                             |
| tr Q0SST6 Q0SST6_CLOPS | 1502 | unknown       | Uncharacterized protein                                           |
| tr Q0SSN8 Q0SSN8_CLOPS | 1552 | unknown       | Lipoprotein, BMP family                                           |
| tr Q0SSJ9 Q0SSJ9_CLOPS | 1592 | unknown       | Uncharacterized protein                                           |
| tr Q0SSE2 Q0SSE2_CLOPS | 1650 | unknown       | Aspartokinase                                                     |
| tr Q0SS88 Q0SS88_CLOPS | 1704 | unknown       | Uncharacterized protein                                           |
| tr Q0SS80 Q0SS80_CLOPS | 1712 | unknown       | Ribosomal RNA small subunit methyltransferase B, Sun              |
| tr Q0SS20 Q0SS20_CLOPS | 1772 | unknown       | Uncharacterized protein                                           |
| tr Q0SRV7 Q0SRV7_CLOPS | 1836 | unknown       | Delta-lactam-biosynthetic de-N-acetylase, PdaA                    |
| tr Q0SRG6 Q0SRG6_CLOPS | 1982 | unknown       | Uncharacterized protein                                           |
| tr Q0SRC3 Q0SRC3_CLOPS | 2025 | unknown       | Uncharacterized protein                                           |
| tr Q0SRB6 Q0SRB6_CLOPS | 2032 | unknown       | Pyruvate-flavodoxin oxidoreductase, NifJ                          |

|                        |      |         |                                                                                     |
|------------------------|------|---------|-------------------------------------------------------------------------------------|
| tr Q0SR94 Q0SR94_CLOPS | 2054 | unknown | Molybdate ABC transporter, molybdate-binding protein, ModA                          |
| tr Q0SR35 Q0SR35_CLOPS | 2113 | unknown | Uncharacterized protein                                                             |
| tr Q0SQW4 Q0SQW4_CLOPS | 2193 | unknown | Mannosyltransferase B, MtfB                                                         |
| tr Q0SQV7 Q0SQV7_CLOPS | 2200 | unknown | Serine protease                                                                     |
| tr Q0SQR1 Q0SQR1_CLOPS | 2270 | unknown | Prepilin-type N-terminal cleavage/methylation domain protein                        |
| tr Q0SQP7 Q0SQP7_CLOPS | 2285 | unknown | Electron transfer flavoprotein, beta subunit/FixA family protein                    |
| tr Q0SQK4 Q0SQK4_CLOPS | 2338 | unknown | Putative maltose/maltodextrin ABC transporter, maltose/maltodextrin-binding protein |
| tr Q0SQJ7 Q0SQJ7_CLOPS | 2345 | unknown | Uncharacterized protein                                                             |
| sp Q0SQG3 RL15_CLOPS   | 2380 | unknown | 50S ribosomal protein L15, RplO                                                     |
| sp Q0SQE7 RL2_CLOPS    | 2396 | unknown | 50S ribosomal protein L2, RplB                                                      |
| sp Q0SQE5 RL4_CLOPS    | 2398 | unknown | 50S ribosomal protein L4, RplD                                                      |
| sp Q0SQ58 MURC_CLOPS   | 2502 | unknown | UDP-N-acetylmuramate--L-alanine ligase, MurC                                        |
| tr Q0SQ56 Q0SQ56_CLOPS | 2504 | unknown | Purine nucleoside phosphorylase, PunA                                               |
| tr Q0SQ38 Q0SQ38_CLOPS | 2522 | unknown | Putative lipoprotein                                                                |
| tr Q0SQ30 Q0SQ30_CLOPS | 2530 | unknown | Uncharacterized protein                                                             |
| tr Q0SPZ4 Q0SPZ4_CLOPS | 2566 | unknown | Spore cortex-lytic enzyme SleC                                                      |
| tr Q0SPY2 Q0SPY2_CLOPS | 2578 | unknown | Conserved domain protein                                                            |
| tr Q0SPX1 Q0SPX1_CLOPS | 2589 | unknown | Conserved domain protein                                                            |



**Table S3. Predicted spore membrane proteins.**

| UniProt ID | Gene name (CPR #) | Fold change (G/D) <sup>a</sup> | THMs <sup>b</sup> | membrane association <sup>c</sup> | protein function                                               |
|------------|-------------------|--------------------------------|-------------------|-----------------------------------|----------------------------------------------------------------|
| Q0SQX6     | 2181              | 0.2                            | 0                 | lipoprotein                       | transcription termination factor Rho                           |
| Q0SVP6     | 0476              | 0.3                            | 0                 | lipoprotein                       | ABC transporter, substrate-binding protein                     |
| Q0SQZ1     | 2166              | 0.3                            | 1                 | IMP                               | ATP synthase subunit b, AtpF                                   |
| Q0SPW6     | 2594              | 0.3                            | 6                 | IMP                               | putative phage infection protein                               |
| Q0SR24     | 2124              | 0.3                            | 10                | IMP                               | PTS system, glucose-specific IIBC component ptsG               |
| Q0SVC0     | 0603              | 0.5                            | 1                 | lipoprotein                       | phosphate ABC transporter, phosphate-binding protein PstS_1    |
| Q0SU32     | 1053              | 0.5                            | 4                 | IMP                               | GerA spore germination protein GerAA                           |
| Q0SUE8     | 0935              | 0.5                            | 12                | IMP                               | PTS system, N-acetylglucosamine-specific IIBC component NagE   |
| Q0SWC5     | 0241              | 0.6                            | 0                 | lipoprotein                       | uncharacterized protein                                        |
| Q0SS66     | 1726              | 0.6                            | 0                 | lipoprotein                       | GTPase Der                                                     |
| Q0SRL7     | 1930              | 0.6                            | 1                 | IMP                               | penicillin-binding protein 1A, PbpA                            |
| Q0SRG7     | 1981              | 0.6                            | 4                 | IMP                               | putative permease                                              |
| Q0SQB8     | 2427              | 0.6                            | 4                 | IMP                               | PIN/TRAM domain protein                                        |
| Q0SRL1     | 1936              | 0.6                            | 6                 | IMP                               | spermidine/putrescine ABC transporter, permease protein PotB   |
| Q0STU6     | 1139              | 0.7                            | 0                 | lipoprotein                       | 3-oxoacyl-[acyl-carrier-protein] synthase 2 FabF               |
| Q0SW79     | 0292              | 0.7                            | 4                 | IMP                               | cell division protein FtsX                                     |
| Q0SRC9     | 2019              | 0.7                            | 4                 | IMP                               | stage V sporulation protein AC, SpoVAC                         |
| Q0SVP5     | 0477              | 0.7                            | 6                 | IMP                               | ABC transporter, permease protein                              |
| Q0SSH7     | 1614              | 0.7                            | 7                 | IMP                               | V-type ATPase, I subunit                                       |
| Q0SSP8     | 1542              | 0.8                            | 0                 | lipoprotein                       | phage shock protein A, PspA                                    |
| Q0SQS7     | 2254              | 0.8                            | 0                 | lipoprotein                       | oligopeptide/dipeptide ABC transporter, ATP-binding protein    |
| Q0SS79     | 1713              | 0.8                            | 4                 | IMP                               | putative neutral zinc metallopeptidase                         |
| Q0SPQ1     | 2671              | 0.8                            | 6                 | IMP                               | membrane protein OxaA                                          |
| Q0SW99     | 0271              | 0.9                            | 1                 | IMP                               | putative transcriptional regulator                             |
| Q0SVF8     | 0565              | 0.9                            | 2                 | IMP                               | ATP-dependent zinc metalloprotease FtsH                        |
| Q0SVA8     | 0615              | 0.9                            | 4                 | IMP                               | spore germination protein, GerABKA family GerKA                |
| Q0SUM3     | 0859              | 0.9                            | 4                 | IMP                               | uncharacterized protein                                        |
| Q0SPW7     | 2593              | 0.9                            | 6                 | IMP                               | putative phage infection protein                               |
| Q0SVC5     | 0598              | 1                              | 1                 | IMP                               | cell envelope-related transcriptional attenuator domain family |
| Q0ST94     | 1343              | 1                              | 8                 | IMP                               | galactoside ABC transporter, permease protein MglC             |
| Q0STF9     | 1276              | 1.1                            | 16                | IMP                               | oligopeptide transporter, OPT family                           |
| Q0SR43     | 2105              | 1.2                            | 0                 | lipoprotein                       | site-determining protein MinD                                  |

|        |      |     |    |             |                                                            |
|--------|------|-----|----|-------------|------------------------------------------------------------|
| Q0SQZ5 | 2162 | 1.2 | 0  | lipoprotein | ATP synthase subunit beta, AtpD                            |
| Q0SVU0 | 0431 | 1.2 | 1  | IMP         | uncharacterized protein                                    |
| Q0SQ68 | 2492 | 1.2 | 1  | lipoprotein | foldase protein PrsA                                       |
| Q0SRD1 | 2017 | 1.2 | 4  | IMP         | stage V sporulation protein AE, SpoVAE                     |
| Q0SUH9 | 0904 | 1.3 | 0  | lipoprotein | substrate-binding protein MsmE                             |
| Q0SSC7 | 1665 | 1.3 | 4  | IMP         | RIP metalloprotease RseP                                   |
| Q0SQP3 | 2289 | 1.3 | 6  | IMP         | zinc-transporting ATPase                                   |
| Q0SV26 | 0698 | 1.4 | 0  | lipoprotein | ABC transporter, ATP-binding protein                       |
| Q0SW78 | 0293 | 1.4 | 1  | IMP         | carboxyl-terminal protease                                 |
| Q0SR23 | 2125 | 1.4 | 1  | lipoprotein | ABC transporter, substrate-binding protein                 |
| Q0STA8 | 1329 | 1.4 | 5  | IMP         | CDP-diacylglycerol--serine O-phosphatidyltransferase PssA  |
| Q0SS49 | 1743 | 1.5 | 1  | IMP         | uncharacterized protein                                    |
| Q0SUS6 | 0806 | 1.5 | 3  | IMP         | PTS system, mannose/fructose/sorbose family, IID component |
| Q0SW07 | 0364 | 1.5 | 4  | IMP         | ABC transporter, permease/ATP-binding protein              |
| Q0SRP0 | 1907 | 1.5 | 6  | IMP         | protein-export membrane protein SecF                       |
| Q0SUR3 | 0819 | 1.5 | 12 | IMP         | antibiotic ABC transporter, permease protein               |
| Q0SU31 | 1054 | 1.5 | 12 | IMP         | C4-dicarboxylate anaerobic carrier family protein          |
| Q0SS83 | 1709 | 1.6 | 1  | IMP         | serine/threonine protein kinase pknB-like protein          |
| Q0SRN6 | 1911 | 1.6 | 1  | IMP         | preprotein translocase, YajC subunit YajC_2                |
| Q0SUS7 | 0805 | 1.6 | 7  | IMP         | PTS system, mannose/fructose/sorbose family, IIC component |
| Q0SRK4 | 1943 | 1.9 | 2  | IMP         | D-alanyl-D-alanine carboxypeptidase family protein         |
| Q0SWD6 | 0230 | 1.9 | 3  | IMP         | uncharacterized protein                                    |
| Q0SWK4 | 0159 | 1.9 | 12 | IMP         | arginine/ornithine antiporter ArcD                         |
| Q0SQG4 | 2379 | 2   | 10 | IMP         | protein translocase subunit SecY                           |
| Q0ST89 | 1348 | 2.2 | 2  | IMP         | uncharacterized protein                                    |
| Q0SQ55 | 2505 | 2.2 | 9  | IMP         | nucleoside transporter, NupC family                        |
| Q0SQS2 | 2259 | 2.2 | 12 | IMP         | major facilitator family transporter                       |
| Q0STX0 | 1115 | 2.3 | 1  | lipoprotein | iron compound ABC transporter, iron-binding protein        |
| Q0SWI7 | 0176 | 2.3 | 13 | IMP         | sodium:solute transporter                                  |
| Q0SVJ4 | 0528 | 2.5 | 1  | IMP         | stage V sporulation protein D                              |
| Q0SUA1 | 0983 | 2.5 | 6  | IMP         | cation efflux family protein                               |
| Q0SSH8 | 1613 | 2.6 | 4  | IMP         | V-type ATPase, K subunit                                   |
| Q0SRN9 | 1908 | 2.6 | 6  | IMP         | protein translocase subunit SecD                           |
| Q0SVP4 | 0478 | 2.9 | 6  | IMP         | ABC transporter, permease protein                          |
| Q0SW39 | 0332 | 3.1 | 1  | IMP         | putative penicillin-binding protein                        |
| Q0SQ81 | 2472 | 3.7 | 2  | IMP         | ATP-dependent zinc metalloprotease FtsH                    |

|        |      |     |    |                     |                                                              |
|--------|------|-----|----|---------------------|--------------------------------------------------------------|
| Q0SQK2 | 2340 | 4.4 | 0  | lipoprotein         | ABC transporter, ATP-binding protein                         |
| Q0SVX2 | 0399 | 4.7 | 3  | IMP                 | PTS system, mannose/fructose/sorbose family, IID component   |
| Q0SU83 | 1001 | 6.4 | 7  | IMP                 | glycerol uptake facilitator protein GlpE                     |
| Q0SWW1 | 0076 | D   | 0  | lipoprotein         | putative pyruvate, phosphate dikinase regulatory protein     |
| Q0SVB6 | 0607 | D   | 0  | lipoprotein         | phosphate import ATP-binding protein PstB                    |
| Q0SS48 | 1744 | D   | 0  | lipoprotein         | GTP-binding protein TypA                                     |
| Q0SRD8 | 2010 | D   | 0  | lipoprotein         | elongation factor 4 LepA                                     |
| Q0STE2 | 1293 | D   | 2  | IMP                 | preprotein translocase, SecG subunit                         |
| Q0SRW8 | 1824 | D   | 4  | IMP                 | small basic protein                                          |
| Q0SR25 | 2123 | D   | 4  | IMP                 | MutS domain-containing protein                               |
| Q0SVV6 | 0415 | D   | 5  | IMP                 | uncharacterized protein                                      |
| Q0SQY9 | 2168 | D   | 5  | IMP                 | ATP synthase subunit a, AtpB                                 |
| Q0SSE6 | 1646 | D   | 6  | IMP                 | Phosphatidylglycerophosphate synthase PgsA                   |
| Q0SVV3 | 0418 | D   | 9  | IMP                 | PTS system, IIBC component                                   |
| Q0SRL6 | 1931 | D   | 9  | IMP                 | sodium:alanine symporter family protein                      |
| Q0SVA9 | 0614 | D   | 10 | IMP                 | spore germination protein GerKB                              |
| Q0SV08 | 0716 | D   | 10 | IMP                 | YeeE/YedE family protein                                     |
| Q0SWR9 | 0093 | D   | 12 | IMP                 | PTS system, N-acetylglucosamine-specific IIBC component NagE |
| Q0SPX4 | 2586 | D   | 13 | IMP                 | xanthine/uracil permease family protein                      |
| Q0SWT6 | 0033 | G   | 0  | lipoprotein         | phosphatidylserine decarboxylase proenzyme Psd               |
| Q0SWB6 | 0253 | G   | 0  | lipoprotein         | PPIC-type PPIASE domain protein                              |
| Q0SW80 | 0291 | G   | 0  | lipoprotein         | putative cell division ATP-binding protein FtsE              |
| Q0SW59 | 0312 | G   | 0  | lipoprotein         | uncharacterized protein                                      |
| Q0SUH6 | 0907 | G   | 0  | lipoprotein         | sugar ABC transporter, ATP-binding protein MsmK              |
| Q0SU63 | 1021 | G   | 0  | lipoprotein         | ABC transporter, ATP-binding protein                         |
| Q0SSA5 | 1687 | G   | 0  | lipoprotein         | signal recognition particle receptor FtsY                    |
| Q0SRB4 | 2034 | G   | 0  | membrane-associated | MurG transferase                                             |
| Q0SQW9 | 2188 | G   | 0  | lipoprotein         | cphB, cyanophycinase                                         |
| Q0SQS6 | 2255 | G   | 0  | lipoprotein         | oligopeptide/dipeptide ABC transporter, ATP-binding protein  |
| Q0SVI2 | 0540 | G   | 1  | lipoprotein         | ABC transporter, substrate-binding protein                   |
| Q0SSJ7 | 1594 | G   | 1  | lipoprotein         | putative lipoprotein                                         |
| Q0SVF9 | 0564 | G   | 1  | IMP                 | signal peptidase I                                           |
| Q0SRW6 | 1826 | G   | 1  | IMP                 | cell division protein FtsQ                                   |
| Q0SR78 | 2070 | G   | 1  | IMP                 | CspC family protein                                          |
| Q0SQT7 | 2244 | G   | 1  | IMP                 | uncharacterized protein                                      |
| Q0SQ36 | 2524 | G   | 1  | IMP                 | uncharacterized protein                                      |
| Q0SWV4 | 0036 | G   | 2  | IMP                 | putative transporter                                         |

|        |      |   |    |     |                                                          |
|--------|------|---|----|-----|----------------------------------------------------------|
| Q0SW05 | 0366 | G | 2  | IMP | toxin secretion/phage lysis holin                        |
| Q0SVY4 | 0387 | G | 2  | IMP | uncharacterized protein                                  |
| Q0SQ93 | 2452 | G | 2  | IMP | putative cation transporter                              |
| Q0SUZ4 | 0730 | G | 4  | IMP | uncharacterized protein                                  |
| Q0SR70 | 2078 | G | 4  | IMP | transmembrane protein Vexp3                              |
| Q0SW08 | 0363 | G | 6  | IMP | ABC transporter, permease/ATP-binding protein            |
| Q0SQS4 | 2257 | G | 6  | IMP | Oligopeptide/dipeptide ABC transporter, permease protein |
| Q0SSP0 | 1550 | G | 8  | IMP | ABC transporter, permease protein                        |
| Q0SSG1 | 1631 | G | 9  | IMP | ferrous iron transport protein B, FeoB_2                 |
| Q0SSS6 | 1513 | G | 10 | IMP | PTS system, sucrose-specific IIBC component              |
| Q0SRC2 | 2026 | G | 10 | IMP | cation-transporting ATPase, P-type                       |
| Q0SU50 | 1034 | G | 12 | IMP | amino acid permease family protein                       |

<sup>a</sup>Function categorization analysis was based on COG database and literature reference.

**Table S4. Differentially detected membrane protein function categorization**

| UniProt ID | gene name (CPR) | fold change (G/D) | protein function                                             | Function categorization <sup>a</sup>      |
|------------|-----------------|-------------------|--------------------------------------------------------------|-------------------------------------------|
| Q0SVP6     | 0476            | 0.3               | ABC transporter, substrate-binding protein                   | ABC transporter, general transport system |
| Q0SR24     | 2124            | 0.3               | PTS system, glucose-specific IIBC component PtsG             | ABC transporter, general transport system |
| Q0SVC0     | 0603            | 0.5               | Phosphate ABC transporter, phosphate-binding protein PstS    | ABC transporter, general transport system |
| Q0SUE8     | 0935            | 0.5               | PTS system, N-acetylglucosamine-specific IIBC component NagE | ABC transporter, general transport system |
| Q0SQS2     | 2259            | 2.2               | Major facilitator family transporter                         | ABC transporter, general transport system |
| Q0SQ55     | 2505            | 2.2               | Nucleoside transporter, NupC family                          | ABC transporter, general transport system |
| Q0SWI7     | 0176            | 2.3               | Sodium:solute transporter                                    | ABC transporter, general transport system |
| Q0STX0     | 1115            | 2.3               | Iron compound ABC transporter, iron-binding protein          | ABC transporter, general transport system |
| Q0SUA1     | 0983            | 2.5               | Cation efflux family protein                                 | ABC transporter, general transport system |
| Q0SVP4     | 0478            | 2.9               | ABC transporter, permease protein                            | ABC transporter, general transport system |
| Q0SQK2     | 2340            | 4.4               | ABC transporter, ATP-binding protein                         | ABC transporter, general transport system |
| Q0SVX2     | 0399            | 4.7               | PTS system, mannose/fructose/sorbose family, IID component   | ABC transporter, general transport system |
| Q0SU83     | 1001            | 6.4               | Glycerol uptake facilitator protein GlpE                     | ABC transporter, general transport system |
| Q0SWR9     | 0093            | D                 | PTS system, N-acetylglucosamine-specific IIBC component NagE | ABC transporter, general transport system |
| Q0SVV3     | 0418            | D                 | PTS system, IIBC component                                   | ABC transporter, general transport system |
| Q0SVB6     | 0607            | D                 | Phosphate import ATP-binding protein PstB                    | ABC transporter, general transport system |
| Q0SRL6     | 1931            | D                 | Sodium:alanine symporter family protein                      | ABC transporter, general transport system |
| Q0SPX4     | 2586            | D                 | Xanthine/uracil permease family protein                      | ABC transporter, general transport system |
| Q0SWV4     | 0036            | G                 | Putative transporter                                         | ABC transporter, general transport system |
| Q0SW08     | 0363            | G                 | multidrug ABC transporter, permease/ATP-binding protein      | ABC transporter, general transport system |
| Q0SVI2     | 0540            | G                 | ABC transporter, substrate-binding protein                   | ABC transporter, general transport system |
| Q0SUH6     | 0907            | G                 | Sugar ABC transporter, ATP-binding protein MsmK              | ABC transporter, general transport system |
| Q0SU63     | 1021            | G                 | ABC transporter, ATP-binding protein                         | ABC transporter, general transport system |
| Q0SU50     | 1034            | G                 | Amino acid permease family protein                           | ABC transporter, general transport system |
| Q0SSS6     | 1513            | G                 | PTS system, sucrose-specific IIBC component                  | ABC transporter, general transport system |
| Q0SSP0     | 1550            | G                 | ABC transporter, permease protein                            | ABC transporter, general transport system |
| Q0SSG1     | 1631            | G                 | Ferrous iron transport protein B FeoB                        | ABC transporter, general transport system |
| Q0SRC2     | 2026            | G                 | Cation-transporting ATPase, P-type                           | ABC transporter, general transport system |

|        |      |     |                                                             |                                                     |
|--------|------|-----|-------------------------------------------------------------|-----------------------------------------------------|
|        |      |     |                                                             | system                                              |
| Q0SR70 | 2078 | G   | Transmembrane protein Vexp3                                 | ABC transporter, general transport system           |
| Q0SQS6 | 2255 | G   | Oligopeptide/dipeptide ABC transporter, ATP-binding protein | ABC transporter, general transport system           |
| Q0SQS4 | 2257 | G   | Oligopeptide/dipeptide ABC transporter, permease protein    | ABC transporter, general transport system           |
| Q0SQ93 | 2452 | G   | Putative cation transporter                                 | ABC transporter, general transport system           |
| Q0SQX6 | 2181 | 0.2 | Transcription termination factor Rho                        | DNA replication, repair, transcription, translation |
| Q0SR25 | 2123 | 0.5 | MutS domain-containing protein                              | DNA replication, repair, transcription, translation |
| Q0SRD8 | 2010 | D   | Elongation factor 4 LepA                                    | DNA replication, repair, transcription, translation |
| Q0SVJ4 | 0528 | 2.5 | Stage V sporulation protein D                               | Cell division, Cell wall and membrane biogenesis    |
| Q0SW39 | 0332 | 3.1 | Putative penicillin-binding protein                         | Cell division, Cell wall and membrane biogenesis    |
| Q0SSE6 | 1646 | D   | Phosphatidylglycerophosphate synthase PgsA                  | Cell division, Cell wall and membrane biogenesis    |
| Q0SWT6 | 0033 | G   | Phosphatidylserine decarboxylase proenzyme Psd              | Cell division, Cell wall and membrane biogenesis    |
| Q0SW80 | 0291 | G   | Putative cell division ATP-binding protein FtsE             | Cell division, Cell wall and membrane biogenesis    |
| Q0SRW6 | 1826 | G   | Cell division protein FtsQ                                  | Cell division, Cell wall and membrane biogenesis    |
| Q0SRB4 | 2034 | G   | MurG transferase                                            | Cell division, Cell wall and membrane biogenesis    |
| Q0SQZ1 | 2166 | 0.3 | ATP synthase subunit b AtpF                                 | Energy production and conversion                    |
| Q0SSH8 | 1613 | 2.6 | V-type ATPase, K subunit                                    | Energy production and conversion                    |
| Q0SQY9 | 2168 | D   | ATP synthase subunit a AtpB                                 | Energy production and conversion                    |
| Q0SQW9 | 2188 | G   | Cyanophycinase CphB                                         | Energy production and conversion                    |
| Q0SU32 | 1053 | 0.5 | GerA spore germination protein, GerAA                       | germination receptor                                |
| Q0SVA9 | 0614 | D   | Spore germination protein, GerKB                            | germination receptor                                |
| Q0SW05 | 0366 | G   | Toxin secretion/phage lysis holin                           | phage protein                                       |
| Q0SQG4 | 2379 | 2   | Protein translocase subunit SecY                            | protein secretion, translocation, turnover          |
| Q0SRN9 | 1908 | 2.6 | Protein translocase subunit SecD                            | protein secretion, translocation, turnover          |
| Q0SQ81 | 2472 | 3.7 | ATP-dependent zinc metalloprotease FtsH                     | protein secretion, translocation, turnover          |
| Q0STE2 | 1293 | D   | Preprotein translocase, SecG subunit                        | protein secretion, translocation, turnover          |
| Q0SWB6 | 0253 | G   | PPIC-type PPIASE domain protein                             | protein secretion, translocation, turnover          |
| Q0SVF9 | 0564 | G   | Signal peptidase I                                          | protein secretion, translocation, turnover          |
| Q0SSA5 | 1687 | G   | Signal recognition particle receptor FtsY                   | protein secretion, translocation, turnover          |
| Q0SR78 | 2070 | G   | CspC family protein                                         | protein secretion, translocation, turnover          |
| Q0SS48 | 1744 | D   | GTP-binding protein TypA                                    | signal transduction mechanism                       |
| Q0SPW6 | 2594 | 0.3 | Putative phage infection protein                            | Unknown function                                    |
| Q0ST89 | 1348 | 2.2 | Uncharacterized protein                                     | Unknown function                                    |

|        |      |   |                                                          |                  |
|--------|------|---|----------------------------------------------------------|------------------|
| Q0SWW1 | 0076 | D | Putative pyruvate, phosphate dikinase regulatory protein | Unknown function |
| Q0SVV6 | 0415 | D | Uncharacterized protein                                  | Unknown function |
| Q0SV08 | 0716 | D | YeeE/YedE family protein                                 | Unknown function |
| Q0SRW8 | 1824 | D | Small basic protein Sbp                                  | Unknown function |
| Q0SW59 | 0312 | G | Uncharacterized protein                                  | Unknown function |
| Q0SVY4 | 0387 | G | Uncharacterized protein                                  | Unknown function |
| Q0SUZ4 | 0730 | G | Uncharacterized protein                                  | Unknown function |
| Q0SSJ7 | 1594 | G | Uncharacterized protein                                  | Unknown function |
| Q0SQT7 | 2244 | G | Uncharacterized protein                                  | Unknown function |
| Q0SQ36 | 2524 | G | Uncharacterized protein                                  | Unknown function |

<sup>a</sup>Function categorization analysis was based on COG database and literature references.

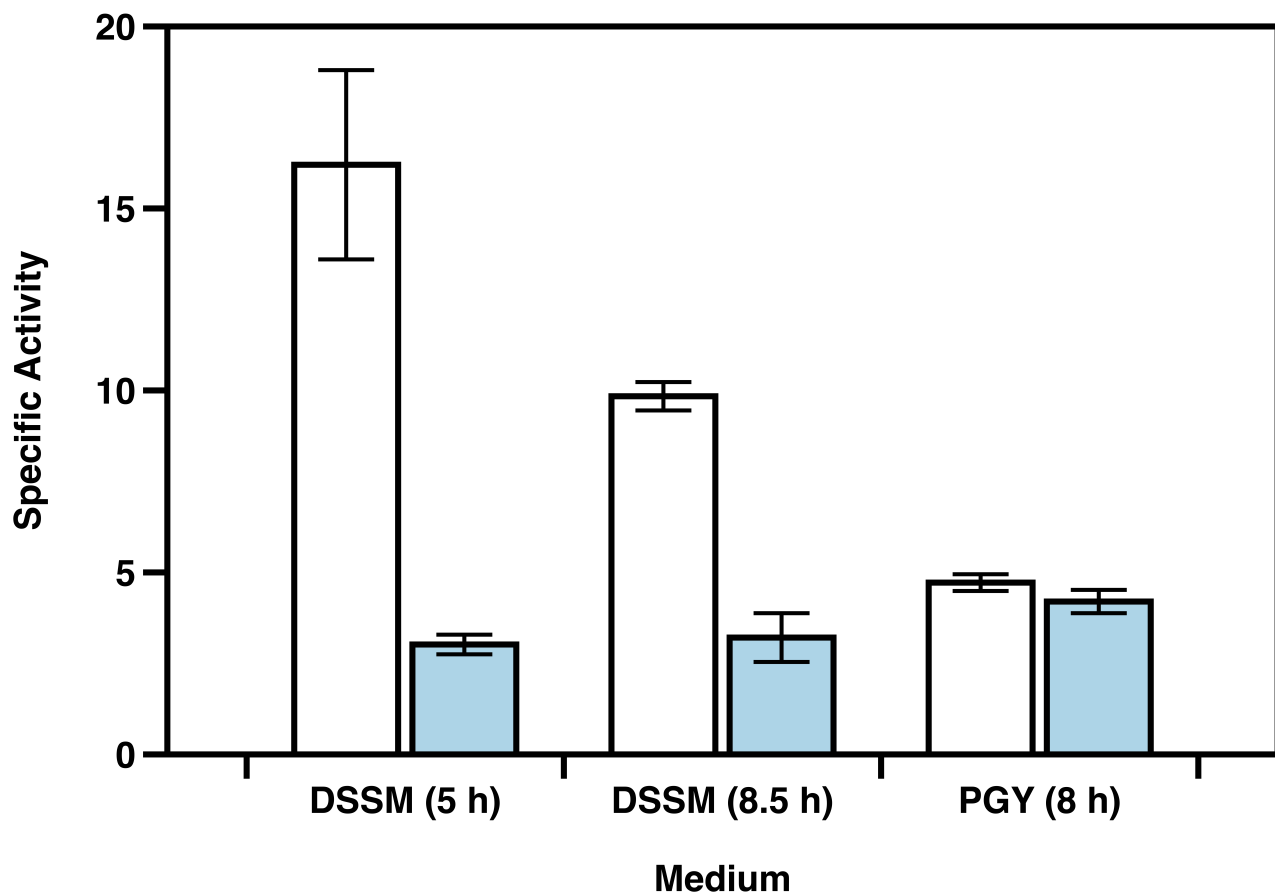

**Figure S1.**  $\beta$ -glucuronidase activity in strain SM101 carrying plasmids pHLL71 (*cphB-gusA*)(white bars) and pSM240 (empty vector)(blue bars). The mean and SD of three individual experiments are shown. DSSM, Duncan Strong sporulation medium; PGY, proteose peptone-glucose-yeast extract medium.



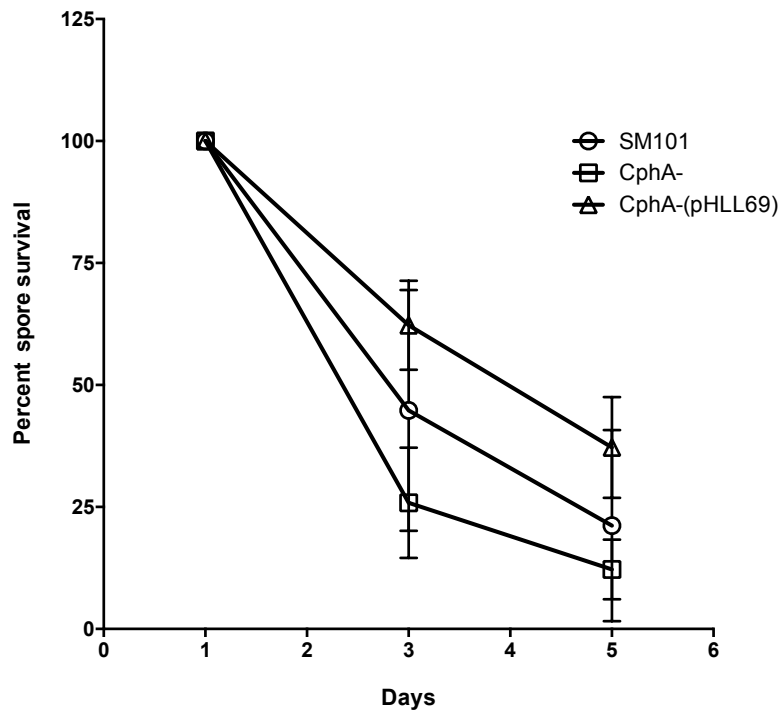

**Figure S2.** Survival of spores in spent sporulation medium (DSSM). The graph shows the means and SD of triplicate samples. There was not statistical difference between strain SM101 and strain HLL68 at either time point examined.

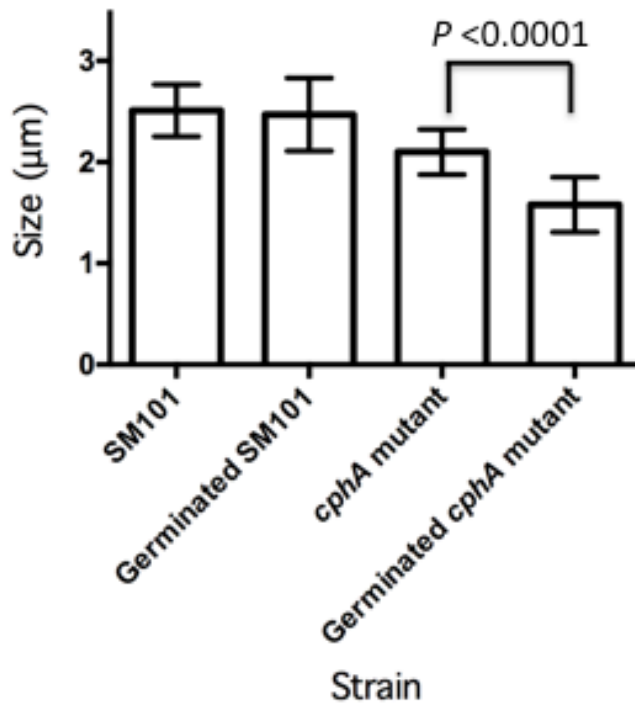

**Figure S3.** Spore sizes measured by phase contrast light microscopy of dormant spores and spores germinated and stored for 16 h in nutrient free medium.
